1 **Title: Test-retest reliability of neural entrainment in the human auditory system**

2

3 **Authors:** Yuranny Cabral-Calderin<sup>1\*</sup> & Molly J. Henry<sup>1\*</sup>

4

5 **Affiliations:** Max Planck Institute for Empirical Aesthetics, Frankfurt am Main, Germany

6

7 **\* Corresponding authors.**

8 \* Yuranny Cabral-Calderin, Max Planck Institute for Empirical Aesthetics, Grüneburgweg 14,

9 60322 Frankfurt am Main, Germany. Tel.: (+49) 69 / 8300479 831. Email: [yuranny.cabral-](mailto:yuranny.cabral-)

10 [calderin@ae.mpg.de](mailto:calderin@ae.mpg.de)

11 \* Molly J. Henry, Max Planck Institute for Empirical Aesthetics, Grüneburgweg 14, 60322

12 Frankfurt am Main, Germany. Tel.: (+49) 69 / 8300479 830. Email: [molly.henry@ae.mpg.de](mailto:molly.henry@ae.mpg.de)

1 **Abstract:** Auditory stimuli are often rhythmic in nature. Brain activity synchronizes with  
2 auditory rhythms via neural entrainment, and entrainment seems to be beneficial for auditory  
3 perception. However, it is not clear to what extent neural entrainment in the auditory system is  
4 reliable over time – a necessary prerequisite for targeted intervention. The current study aimed  
5 to establish the reliability of neural entrainment over time and to predict individual differences  
6 in auditory perception from associated neural activity. Across two different sessions, human  
7 listeners detected silent gaps presented at different phase locations of a 2-Hz frequency  
8 modulated (FM) noise while EEG activity was recorded. As expected, neural activity was  
9 entrained by the 2-Hz FM noise. Moreover, gap detection was sinusoidally modulated by the  
10 phase of the 2-Hz FM into which the gap fell. Critically, both the strength of neural entrainment  
11 as well as the modulation of performance by the stimulus rhythm were highly reliable over  
12 sessions. Moreover, gap detection was predictable from pre-gap neural 2-Hz phase. Going  
13 beyond previous work, we found that stimulus-driven behavioral modulation was better  
14 predicted by the interaction between delta and alpha phase than by delta or alpha phase alone,  
15 both within and across sessions. Taken together, our results demonstrate that neural entrainment  
16 in the auditory system and the resulting behavioral modulation are reliable over time. In  
17 addition, both entrained delta and non-entrained alpha oscillatory phase contribute to near-  
18 threshold stimulus perception.

19

20 **Keywords:** Reliability, neural entrainment, auditory perception, auditory entrainment,  
21 frequency modulation (FM), delta frequency, alpha frequency, oscillations, EEG, phase, brain  
22 rhythms.

## 1 **Introduction**

2 Auditory stimuli, such as music, speech, and animal vocalizations, are often (quasi-)rhythmic  
3 in nature. As such, one neural mechanism that has received much recent attention for its  
4 contribution to our ability to understand the auditory world is synchronization of brain activity  
5 to the rhythms of sounds: neural entrainment (1). Neural entrainment is the process by which  
6 neural oscillations phase lock to the rhythms of external sensory stimulation, and has been  
7 proposed to be a key mechanism for controlling neural sensory gain (1, 2), attention, and parsing  
8 (3) of sensory information that is extended in time. Since neural oscillations are associated with  
9 rhythmic fluctuations in the excitation-inhibition balance of neuronal populations (4, 5), neural  
10 entrainment by sensory stimulation can modulate perception of physically identical stimuli  
11 depending on their timing relative to the phase of entrained neural activity (6, 7). That is, the  
12 phase of the entrained oscillation determines whether sensory information is selectively  
13 amplified or suppressed (1).

14 Entrainment to rhythmic environmental stimuli has been described for different sensory  
15 modalities (7-9) and across different species (10, 11). In humans, low-frequency M/EEG  
16 delta/theta activity has been shown to synchronize to the rhythms of speech and music  
17 (quantified as the amplitude envelope of the stimuli), and the success with which this  
18 synchronization between brain rhythms and auditory stimuli occurs seems to be critical for  
19 successful auditory perception (12, 13), in particular in noisy listening situations (14-17).

20 If neural entrainment does play a critical mechanistic role for auditory perception, improving  
21 the synchrony between brain activity and stimulus rhythms should result in benefits for  
22 perception (during e.g., listening in noise). In fact, recent work has used transcranial electrical  
23 stimulation (TES) with alternating current (tACS) to interfere with entrainment to auditory  
24 stimuli and reported significant modulation of speech comprehension and stream segregation  
25 (18-22). For example, applying tACS with speech envelope has been shown to modulate the  
26 intelligibility of speech in noise, depending on the phase lag between the electrical stimulation  
27 and the speech (21). However, there is some uncertainty in tACS results (see e.g., (23)) and its  
28 effectivity for modulating neural entrainment is still under debate. One untested prerequisite  
29 for effectively using TES as a targeted intervention is the reliability of neural entrainment over  
30 time, i.e., across sessions and days. Establishing the reliability of neural entrainment in the  
31 auditory system is a necessary step towards understanding the role of neural oscillations and  
32 entrainment for perception, and is critical to pave the way for therapeutic applications based on  
33 TES or other noninvasive techniques that target the relationship between neural and

1 environmental rhythms. The current study aimed to quantify the reliability of neural  
2 entrainment in the auditory system over time, and moreover to predict individual differences in  
3 auditory perception from neural activity.

4 Not all stimuli are rhythmic. Thus, multiple neural processing modes have been proposed:  
5 “rhythmic-mode” and “continuous-mode” processing (24, 25), only the former of which relies  
6 on neural entrainment. Even in the case of purely rhythmic stimulation, lapses of attention have  
7 been related to lapses of entrainment, and are rather associated with periods of high-amplitude  
8 alpha oscillations (2). Higher alpha amplitude has also been related to reduced entrainment-  
9 driven behavioral modulation (26). Taken together, these findings suggest that alpha activity  
10 and entrainment represent opposing neural strategies (i.e., continuous-mode vs. rhythmic-  
11 mode, or internally vs. externally oriented, respectively), which comodulate behavior. Here, in  
12 addition to examining the influence of entrained neural activity on auditory perception (6, 27),  
13 we attempted to take the influence of alpha activity into account, in order to provide a more  
14 complete picture of the neural mechanisms underlying auditory perception in a vigilance task  
15 utilizing rhythmic stimuli.

16 We employed a paradigm previously used by (7), where stimulus periodicity was  
17 communicated by frequency modulation (FM). Participants detected brief auditory targets  
18 (silent gaps) embedded in an ongoing 2-Hz FM stimulus (**Fig. 1**). Each participant took part in  
19 two EEG sessions. Based on previous literature, we expected that the 2-Hz FM stimulus would  
20 entrain delta oscillations in the brain and, as such, gap detection would be modulated by the  
21 phase of both the stimulus and the entrained neural oscillation in which target gaps occurred.  
22 Furthermore, if neural entrainment is reliable over time, both FM-stimulus induced behavioral  
23 modulations and EEG activity should show high inter-session correlations. Our multi-session,  
24 within-subject design provided us with a novel opportunity for testing the reliability of  
25 entrainment, while controlling for stable individual differences such as anatomical variability  
26 or hearing ability. We argue that, while neural entrainment and stimulus-driven behavioral  
27 modulation are indeed highly reliable between sessions, auditory perception cannot be  
28 exclusively explained by entrained low-frequency neural activity. Both entrained delta phase  
29 and non-entrained alpha activity contributed to stimulus-induced modulation of auditory  
30 perception.

## 1 Results

2 In two different sessions, EEG activity was recorded while listeners detected silent gaps  
3 embedded in 20-s long complex tones that were frequency modulated at 2 Hz (**Fig. 1**). Based  
4 on previous literature, we predicted that delta oscillations would be entrained by the 2-Hz FM.  
5 We aimed to quantify how reliable that entrainment would be across sessions, both in terms of  
6 entrainment strength and the phase relationship between stimulus and brain.

7

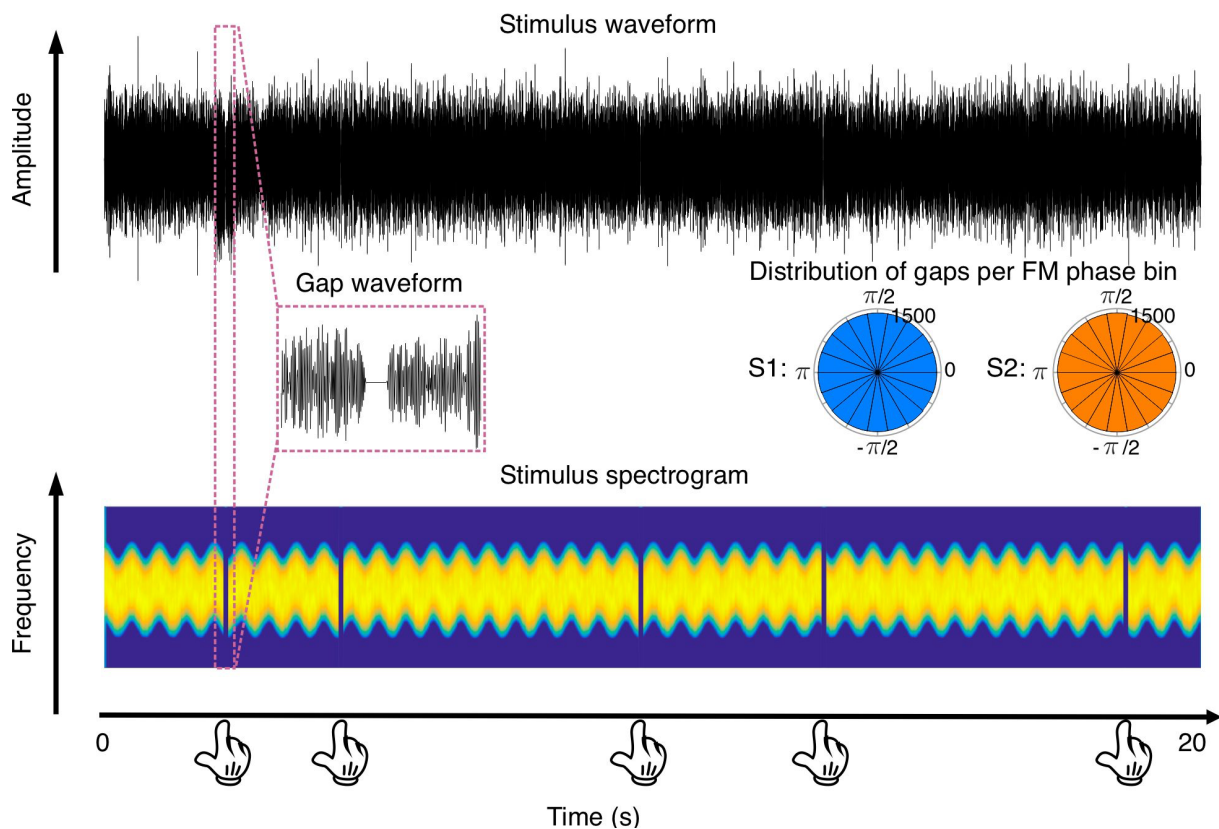

8  
9

10 **Fig. 1. Auditory stimuli.** Stimuli were 20-s long frequency modulated (FM) sounds whose frequency  
11 fluctuated rhythmically at 2 Hz (bottom), without periodic fluctuations in amplitude (top). Participants  
12 detected short silent gaps (middle left: Gap waveform) embedded in the sound in one of 18 possible  
13 phase bins, uniformly distributed around the 2 Hz FM cycle. Each sound had 3, 4, or 5 gaps. Participants  
14 responded with a button press each time they detected a silent gap. Circular histograms in the figure  
15 (middle right: Distribution of gaps per FM phase bin) show the distribution of gaps per phase bin across  
16 participants, separated by session. S1: session 1; S2: session 2. Hand icon was downloaded from  
17 <https://www.stockio.com/>.

18

### 19 *Auditory entrainment to FM sounds has high inter-session reliability*

20 We evaluated entrainment using four converging analyses. We considered both total and  
21 evoked amplitudes of EEG data. In addition, we calculated inter-trial phase coherence (ITPC)

1 across the full epoch based on complex Fourier output, and in a time-resolved way based on  
2 the output of a wavelet convolution. For evoked amplitude spectra, single-trial time-domain  
3 data were first averaged over trials, and then subjected to a Fast Fourier transform (FFT); this  
4 analysis is particularly sensitive to neural activity that was phase-locked to the stimulus rhythm  
5 across trials. For the total amplitude spectra, the FFT was computed for each single trial, and  
6 then the single-trial frequency-domain signals were averaged; this analysis is mostly sensitive  
7 to high-amplitude neural activity, and is agnostic to whether that activity is phase-locked across  
8 trials. Finally, ITPC was calculated based on the phase (rather than the amplitude) information  
9 from the complex output of a FFT calculated on the full-stimulus epoch (with onset- and offset-  
10 responses removed) or using the time-resolved complex output of the wavelet convolution (see  
11 Methods); these analyses quantify trial-to-trial consistency (i.e., resultant vector length) but are  
12 mostly insensitive to amplitude information (28).

13 For evoked spectra, we observed high-amplitude peaks at the stimulus FM frequency and its  
14 first harmonic (i.e., 2 Hz and 4 Hz respectively, **Fig. 2a**), consistent with neural tracking of the  
15 rhythm of the FM stimulus (6, 7). Relatively high spectral amplitude was also observed in the  
16 alpha frequency band (7-12 Hz). For all further analyses on alpha activity, we considered  
17 activity between 7 Hz and 12 Hz, because this frequency range best captured the observed  
18 increase in alpha evoked amplitude (**Fig. 2a**). To test for statistical significance, evoked  
19 amplitudes for 2 Hz, 4 Hz, and alpha (averaged over 7–12 Hz) frequencies, averaged over all  
20 electrodes, were compared to the average amplitude of the neighboring frequency bins (i.e.,  $\pm 8$   
21 frequency bins/0.16 Hz for 2 Hz and 4 Hz and  $\pm 100$  frequency bins/2 Hz for alpha, see  
22 Methods) similar to previous studies (7, 27). Evoked amplitudes for 2 Hz, 4 Hz, and alpha  
23 frequencies were significantly different than the average amplitude of the neighboring  
24 frequency bins (all  $p < 2.95e-07$ , see Methods). Total amplitude spectra showed high amplitude  
25 in alpha frequency band, while 2-Hz and 4-Hz amplitudes were less visible in the spectra due  
26 to the high  $1/f$  power (**Fig. S1**). Nevertheless, compared to the average amplitude of the  
27 neighboring frequency bins, 2 Hz, 4 Hz, and alpha amplitudes were also significant in the total  
28 amplitude spectra (all  $p < 0.001$ ). Moreover, the ITPC analysis showed clear peaks at 2 Hz and  
29 4 Hz, again suggesting entrainment at the stimulus FM frequency and its first harmonic (**Fig.**  
30 **2b**). In both sessions, ITPC at 2 Hz and 4 Hz was significantly different than the neighboring  
31 frequency bins (same neighboring frequency bins as defined for the evoked amplitude analysis,  
32 all  $p < 7.74e-08$ ). Finally, time-resolved ITPC at 2 Hz and 4 Hz, averaged over electrodes and  
33 time was significantly different than for the neighboring frequency bins ( $\pm 8$  frequency  
34 bins/0.81Hz, all  $p < 1.07e-07$ , **Fig. 2b**, right). As observed in **Fig. 2a**, FM-stimulus-evoked

1 amplitude at 2 Hz and 4 Hz was mostly observed in a fronto-central cluster including electrodes  
2 F3, Fz, F4, FC1, FC2, C3, Cz, C4, F1, F2, FC3, FC4, C1 and C2 (**Fig. 2a**, insets). Therefore,  
3 all further analyses involving these frequencies were done first independently by electrode and  
4 then averaged over this subset of electrodes.

5

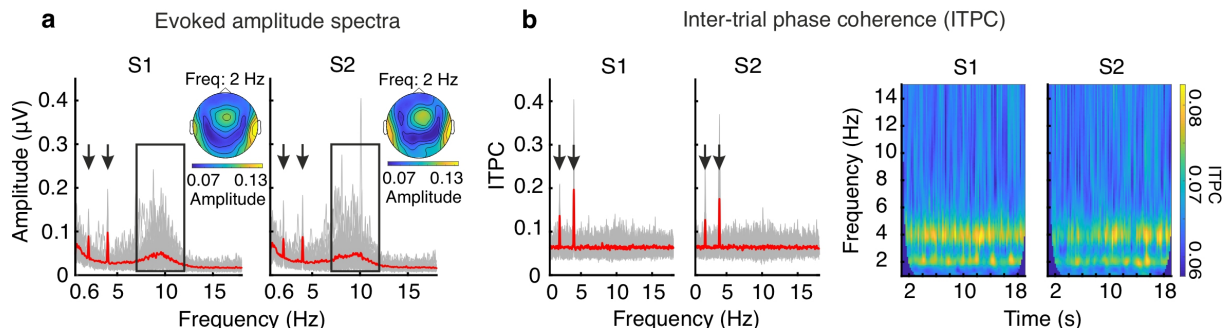

6

7

8 **Fig. 2. Neural entrainment to 2-Hz FM stimulus.** (a) Evoked amplitude spectra from the fast Fourier  
9 transform (FFT) of the time-domain EEG signal. Red solid lines indicate the group average spectrum,  
10 gray lines show single participants' spectra, averaged over all electrodes. Inset plots show the  
11 topography for the 2 Hz amplitude spectrum averaged across participants, separately for session 1 and  
12 session 2. (b) Inter-trial phase coherence (ITPC) indicating the degree of phase clustering across trials  
13 for each frequency (left), averaged over all electrodes. Gray lines show individual values and red lines  
14 show group average. (right) ITPC shown over time, again averaged across participants and all  
15 electrodes. S1: session 1; S2: session 2. Arrows in (a) and (b) indicate the peaks in amplitude and ITPC  
16 at the 2-Hz FM stimulus frequency and its first harmonic. Rectangles in (a) indicate the frequency range  
17 considered for further alpha analyses.

18

19

20 Moving a step past previous literature, we next asked whether FM-induced entrainment is  
21 reliable over time by correlating the amplitude of the stimulus-evoked activity at 2 Hz, 4 Hz,  
22 and in the alpha frequency band, as well as the stimulus-brain lag (i.e., the phase angle of the  
23 2-Hz complex output of the FFT calculated for the full stimulus epoch) across sessions. Inter-  
24 session correlations were high and significant for evoked amplitudes at 2 Hz ( $\rho = 0.64$ ,  $p =$   
25  $2.71e-05$ ), 4 Hz ( $r = 0.77$ ,  $p = 1.21e-08$ ), and in the alpha band ( $r = 0.78$ ,  $p = 5.47e-09$ ; **Fig. 3a**).  
26 No significant difference was observed in the amplitude spectra between sessions for any of the  
27 frequencies of interest. Despite individual variability, stimulus-brain phase lags were not  
28 uniformly distributed as reported in previous work, but were significantly phase clustered for  
29 both sessions (Rayleigh test, session 1:  $z = 23$ ,  $p = 9.52e-13$ ; session 2:  $z = 17$ ,  $p = 8.78e-09$ ,  
30 **Fig. 3b**). Moreover, phase lags were reliable across sessions as indexed by the high circular-  
31 circular correlation ( $\rho = 0.62$ ,  $p = 0.004$ ) and a circular distance between sessions clustered  
32 around zero (Rayleigh test,  $z = 25.72$ ,  $p = 1.19e-14$ ). Taken together, amplitude spectra and

1 phase lags suggested that neural entrainment to FM stimuli is reliable across sessions, which is  
2 the first vital prerequisite for targeted interventions of auditory-cortex neural oscillations.

3

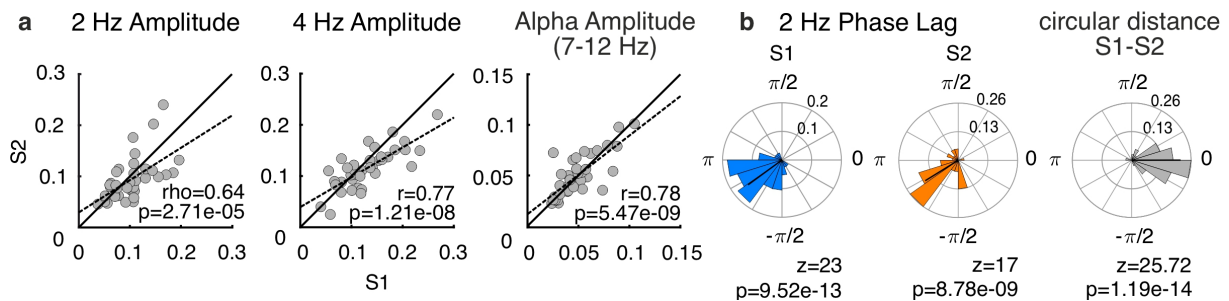

4

5

6 **Fig. 3. Reliability of neural entrainment.** (a) Inter-session correlation of 2 Hz (left), 4 Hz (middle)  
7 and alpha (right) amplitudes. Correlation coefficients and associated p-values are given in each plot.  
8 Each dot represents a single participant. The solid black line is the diagonal and the dashed line  
9 represents the best-fit straight line. (b) Circular histograms show neural phase lag relative to the 2-Hz  
10 FM stimulus for session 1 (blue, left) and session 2 (orange, middle). The z-values and associated p-  
11 values from the Rayleigh test are given in each plot. Circular distance between phase lags in the different  
12 sessions is shown in the circular histogram in the Right. S1: session 1; S2: session 2.

13

14 ***Stimulus-induced behavioral modulation is sinusoidal and shows high inter-session***  
15 ***reliability***

16 While listening to the FM sounds, participants responded with a button press each time they  
17 detected a silent gap. Each 20-s long stimulus contained three, four, or five gaps. Gaps were  
18 distributed uniformly around the 2-Hz FM cycle in 18 possible phase positions (Fig. 1). A  
19 response was considered to be a “hit” if a button press occurred within a window of 0.1-1.5 s  
20 after gap onset.

21 We hypothesized that, as a consequence of the stimulus-induced entrainment of delta  
22 oscillations, hit rates for gap detection would be sinusoidally modulated by the FM stimulus  
23 phase. To go a step past previous studies, we also asked whether this modulation is reliable  
24 across sessions. While several studies have focused on analyzing oscillatory modulation of  
25 perception at the group level by aligning single-participant data to the phase with best or worst  
26 performance (see (29) for recommendations), here we took a different approach and  
27 investigated whether the magnitude of stimulus-driven behavioral modulation and the preferred  
28 (best) FM-stimulus phase were consistent across sessions within an individual.

29 For each session separately, hit rates were calculated for each FM-phase bin (Fig. 4a, Fig. S2).  
30 Then, we fit a cosine function to hit rates as a function of phase for each participant and each



1 session. The resulting amplitude parameter from the cosine fit was taken as an index of the  
2 strength of the behavioral modulation. Significance of the sinusoidal modulation was tested  
3 using a permutation approach, whereby 1000 surrogate datasets were created for each  
4 participant and session by shuffling the single-gap accuracy values (0,1) with respect to their  
5 stimulus-phase labels. Cosine functions were fitted to the surrogate data and the fitted amplitude  
6 from the real data was compared for each participant and session to the surrogate data (see  
7 Methods). Significant behavioral modulation was observed for 32/38 participants in session 1  
8 and 37/38 in session 2 ( $z$ -score  $\geq 3.2$ ,  $p < 0.05$ , Bonferroni corrected, **Fig. 4b**). Similar  
9 sinusoidal modulation was also observed for the reaction times but with opposite phase lag (i.e.,  
10 high accuracy and fast RTs occurred in the same ‘optimal’ stimulus phase; **Fig. S3a**).

11 The fitted modulation amplitude values were highly correlated between sessions ( $r = 0.88$ ,  $p =$   
12  $2.22e-13$ , **Fig. 4b**), indicating that FM-induced behavioral modulation was reliable. Individual  
13 preferred FM phases (the FM-stimulus phase yielding highest performance) were estimated  
14 from the fitted cosine functions per participant and per session (**Fig. 4b**). Preferred phases were  
15 not uniformly distributed, but clustered in one half of the FM cycle (Rayleigh test; session 1:  $z$   
16  $= 34.4$ ,  $p = 1e-22$ ; session 2:  $z = 35.7$ ,  $p = 1.76e-24$ ). Preferred phases were also highly  
17 correlated between sessions (circular–circular correlation;  $\rho = 0.62$ ,  $p = 0.036$ , **Fig. 4b**).  
18 Moreover, circular distance between preferred phases in session 1 and session 2 was clustered  
19 around zero (Rayleigh test;  $z = 35.7$ ,  $p = 1.94e-24$ ), suggesting that preferred phase is also a  
20 reliable attribute of FM-induced behavioral modulation.

21 We recognized that high reliability in preferred FM phase across sessions may have been at  
22 least partially attributable to clustering of preferred phases across participants in the first place  
23 – since preferred phases were significantly clustered across participants, we wanted to be  
24 careful not to overinterpret similar mean preferred phase across sessions as reflecting within-  
25 participant reliability. In order to test this possibility, we conducted a permutation test in which  
26 the order of participants in session 2 was permuted 1000 times relative to the session-1 order,  
27 and the circular–circular correlation between individual preferred phases in session 1 and  
28 (permuted) 2 was computed. If inter-session correlations are driven by the similarity between  
29 participants, permuting the participant order in session 2 should not have affected inter-session  
30 correlations. However, demonstrating the reliability of preferred phase, the inter-session  
31 correlation in the original data was significantly higher than inter-session correlations on the  
32 permuted samples ( $z = 3.66$ ;  $p < 0.001$ , **Fig. S3b**).

1 In addition to the fitted amplitude parameters and preferred FM phases for gap-detection  
 2 performance, hit rates (over the entire session), false-alarm rates, reaction times, and threshold  
 3 gap durations were also highly correlated across sessions ( $Rho \geq 0.5$ ,  $p \leq 0.002$ , **Fig. 4c**). When  
 4 each of the dependent measures were directly compared across sessions, a significant difference  
 5 was observed only for the gap duration (*Wilcoxon signed rank test*,  $z = 2.99$ ,  $p = 0.003$ ).  
 6 Individually adjusted gap durations estimated using our threshold procedure were shorter in  
 7 session 2 than in session 1. Since hit rates were not significantly different between sessions, the  
 8 decrease in threshold gap duration suggests that participants experienced some degree of  
 9 learning or practice effect, and could recognize shorter gaps in session 2. The reduction in  
 10 threshold gap duration between session 1 and 2 was significantly correlated with music  
 11 perceptual abilities ( $Rho = 0.39$ ,  $p = 0.017$ ), as measured with the Goldsmiths Musical  
 12 Sophistication Index (Gold-MSI, (30)), very tentatively suggesting that individuals with  
 13 stronger music skills might have experienced a greater benefit of repeated exposure across  
 14 session.

15

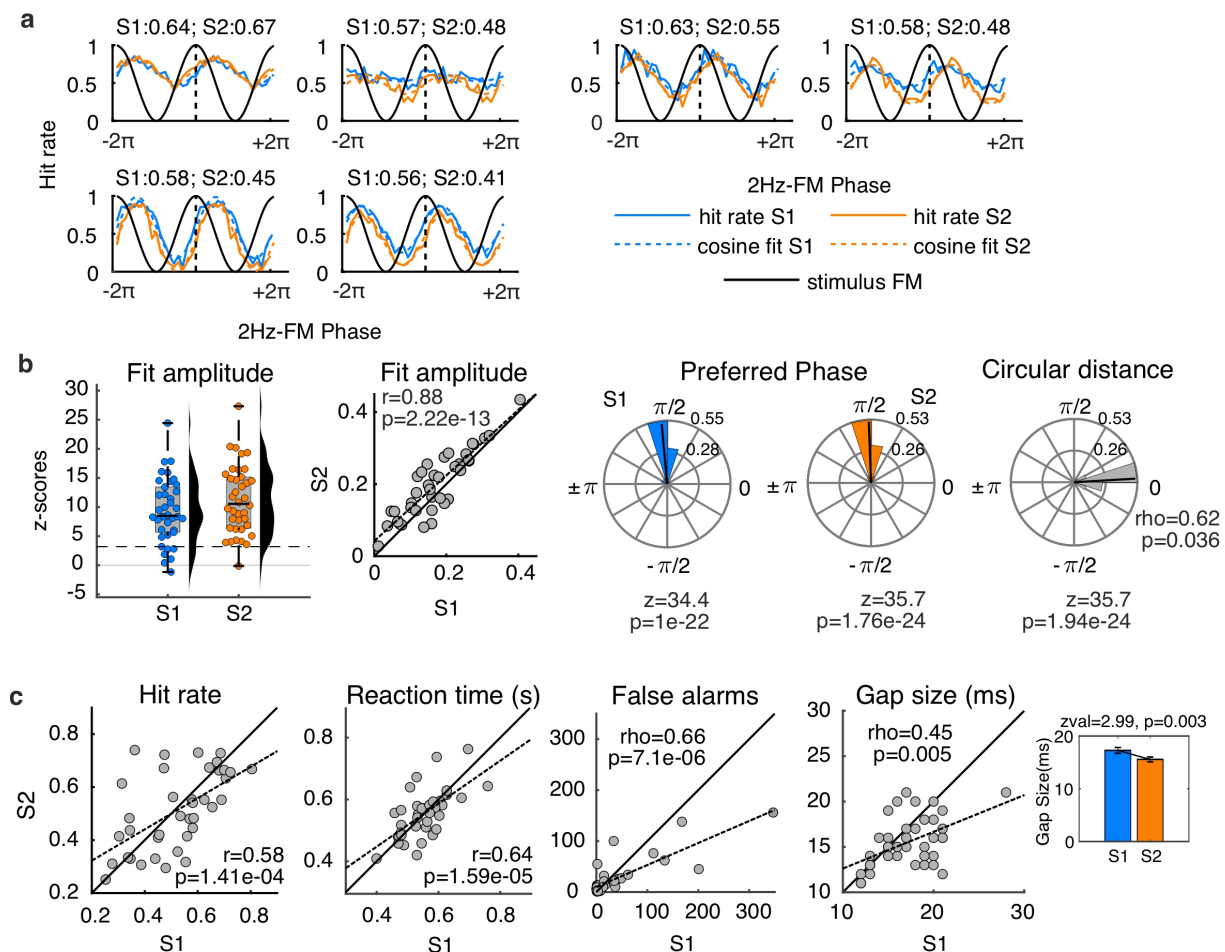

16

17

1 **Fig. 4. Stimulus-driven behavioral modulation and its reliability.** (a) Hit rates as a function of 2-Hz  
2 FM stimulus phase. Dashed blue and orange lines represent the fitted cosine functions for sessions 1 and  
3 2, respectively. Numbers on top of each graph show the mean hit rate across phase bins for each session.  
4 Each graph shows data for a different single participant. In all panels, blue represents session 1 (S1) and  
5 orange represents session 2 (S2). (b) The plot on the left shows the distribution and spread of the z-  
6 scores of the amplitude of the observed sinusoidal modulation for each session. The box plot shows  
7 median (black horizontal line), 25<sup>th</sup> and 75<sup>th</sup> percentiles (box edges) and extreme datapoints (whiskers).  
8 Each circle represents a single participant. Horizontal dashed line marks the significance threshold of  $z$   
9  $= 3.2$  (*Bonferroni* corrected z-score value for 76 comparisons -i.e., 38 subjects x 2 sessions). Scatter plot  
10 in the middle shows the correlation between the fit amplitudes for the 2 sessions. Solid line is the  
11 diagonal and dashed line shows the best-fit straight line. Circular histograms on the right of the panel  
12 show individual preferred phases (i.e., phase in the cosine fit with highest hit rate) separated by session  
13 (left and middle histograms) and the circular distance between the two (right histogram). *Z* and *P-values*  
14 in the plots refer to the results from the Rayleigh test. (c) Scatter plots show inter-session correlations  
15 for hit rates, reaction times, false alarms rates, and gap durations. Solid lines are the diagonal and dashed  
16 lines show the best-fit straight lines.  
17

### 18 *Pre-stimulus neural 2-Hz phase predicts gap detection*

19 In the previous sections, we showed that the 2-Hz FM stimulus entrained neural activity at the  
20 modulation frequency and that gap-detection performance was sinusoidally modulated by FM  
21 phase. Therefore, we expected that pre-gap brain activity should also predict gap-detection  
22 performance. We examined the effects of the neural phase and amplitude in the FM stimulus  
23 frequency band (2 Hz), as well as the neural phase and amplitude in the alpha frequency band  
24 (7-12 Hz), extracted from the pre-gap time window (see Methods). Both entrained 2-Hz and  
25 non-entrained alpha activity were taken into account since our initial FFT analysis showed  
26 stimulus-driven modulation of both (**Fig. 2a**). Five logistic regression models were fitted to the  
27 individual data using different combinations of regressors aiming to predict trial-based gap  
28 detection performance (hit/miss). For model selection, Akaike's information criterion (AICc,  
29 corrected for small samples) values were averaged across participants separated by session  
30 (**Table S1**). In both sessions, the smallest AICc values were obtained for the model that  
31 included pre-gap neural 2 Hz phase, pre-gap neural alpha phase and pre-gap alpha amplitude.  
32 Note however, that the difference in AICc values between models was small in some cases. To  
33 further test the significance of each predictor at the group level, the individual beta estimates  
34 were compared to the mean beta estimates obtained from fitting the same model to surrogate  
35 datasets (see Methods). For each subject and session, 1000 surrogate datasets were created by  
36 shuffling the dependent variable, single-gap accuracy values (0,1), while keeping all  
37 independent regressors fixed.

38 Gap detection was significantly modulated by pre-gap 2-Hz phase (S1:  $t(37) = 3.31$ ,  $p = 0.01$ ;  
39 S2:  $z = 3.14$ ,  $p = 0.01$ , **Fig. 5a**). No significant effect of alpha phase was observed (uncorrected  
40  $p > 0.16$ , S1 and  $p > 0.38$  S2, **Fig. 5a**). The effect of alpha amplitude was significant although

1 it did not survive *Bonferroni* correction (S1:  $z(37) = 2.17$ ,  $p = 0.03$ , uncorrected; S2:  $t(37) =$   
 2  $2.2$ ,  $p = 0.03$ , uncorrected, **Fig. 5a**). Note that although alpha phase and amplitude were not  
 3 considered significant predictors of gap-detection performance using this permutation strategy,  
 4 they did contribute to the best-fitting logistic regression model, as indexed by AICc. No  
 5 significant difference was observed between the two sessions for any of the predictors.  
 6

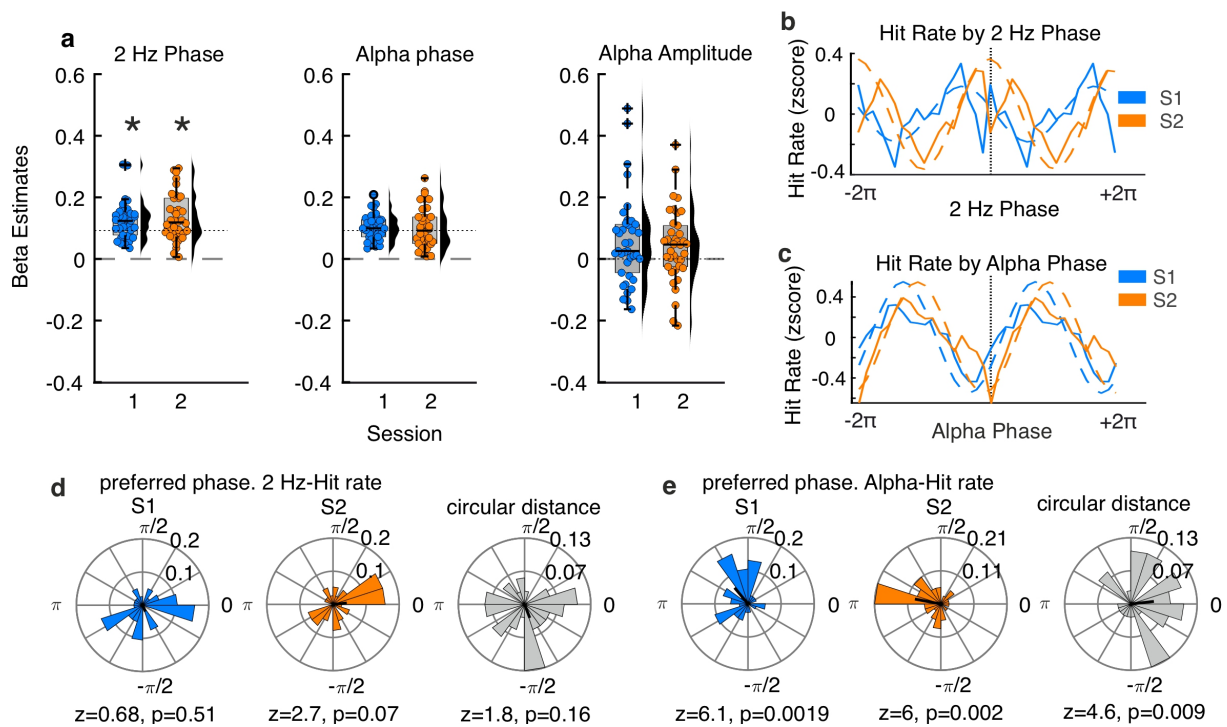

7  
 8  
 9 **Fig. 5. Effect of pre-gap activity on gap detection.** (a) Beta estimates (including distribution and  
 10 spread) for 2-Hz phase (left), alpha phase (middle), and alpha amplitude (right) from the winning  
 11 individual logistic regression models fitted to the EEG data. Box plots show median (black horizontal  
 12 line), 25<sup>th</sup> and 75<sup>th</sup> percentiles (box edges) and extreme datapoints (whiskers). Black crosses represent  
 13 outlier values. Each circle represents a single participant. Horizontal dotted lines mark the median of  
 14 the beta estimates obtained from the logistic regressions fitted to the surrogate datasets, against which  
 15 the beta estimates from the true data were compared. P-values are *Bonferroni* corrected and show the  
 16 significant effect at the group level for a given predictor. (b) Effect of 2-Hz pre-gap phase. For  
 17 visualization, the pre-gap neural phase at 2 Hz was grouped in 18 equally spaced bins and hit rates  
 18 were calculated for each bin according to its pre-gap 2-Hz phase. The figure shows the average across  
 19 participants. Two cycles are shown for illustration purposes. Solid lines represent the actual data and  
 20 dashed lines represent the fitted cosine function. (c) Similar to (b), but the data were binned  
 21 according to pre-gap alpha phase. (d) Preferred neural 2-Hz phase separated by session (left, middle) and  
 22 circular distance between the two sessions' preferred phases (right). (e) Same as in (d) but for pre-gap alpha  
 23 phase. S1: session 1 (blue); S2: session 2 (orange).  
 24

25  
 26 Next, we evaluated the clustering across participants of preferred neural 2-Hz and alpha phases  
 27 and tested the reliability of preferred neural phases across sessions. Trials were sorted and  
 28 binned according to the instantaneous neural phase at 2 Hz (**Fig. 5b**) or in the alpha frequency  
 29 band (7-12 Hz, **Fig. 5c**), using 18 equally spaced phase bins. Hit rates were calculated for each

1 bin and cosine functions were fitted to each individual participant's data in order to estimate  
2 preferred neural phase, similar to the behavioral analysis. Rayleigh tests did not show any  
3 significant deviation from uniformity for 2-Hz preferred phases within either session (all  $Z <$   
4  $2.7$ ,  $p > 0.007$ ). In line with this lack of consistency, we observed a nonsignificant clustering  
5 of circular distances between preferred phases across sessions ( $Z = 1.8$ ,  $p = 0.16$ , **Fig. 5d**) and  
6 a nonsignificant correlation between preferred phases across sessions for the optimal 2-Hz  
7 neural phase for gap detection (circular-circular correlation  $Rho = 0.12$ ,  $p = 0.44$ ). In contrast,  
8 Rayleigh tests showed significant clustering of preferred alpha phases across participants in  
9 both sessions ( $Z > 6$ ,  $p < 0.002$ ). Moreover, circular distances between preferred alpha phases  
10 across sessions were significantly clustered ( $Z = 4.6$ ,  $p = 0.009$ , **Fig. 5e**), although preferred  
11 alpha phases did not significantly correlate across sessions ( $Rho = 0.24$ ,  $p = 0.12$ ). Thus, while  
12 2-Hz preferred neural phases were randomly distributed across participants and were not stable  
13 between sessions, preferred alpha phase was more consistent across participants and sessions.  
14 Gap-evoked potentials (ERPs) can be seen in supplemental results and Fig. S5.

15

16 *Stimulus-driven behavioral modulation is better predicted by the interaction between*  
17 *entrained 2-Hz and non-entrained alpha phase effects than by either frequency band alone*

18 Our analyses up to this point demonstrated that single-trial gap-detection performance was  
19 mostly predictable from 2-Hz pre-gap phase. However, in the logistic regression models, 2 Hz  
20 and alpha phase effects were modelled independently and therefore no phase–phase interaction  
21 between frequency bands was tested. Therefore, we next asked whether single-trial gap-  
22 detection performance was co-modulated by pre-gap neural 2 Hz phase and pre-gap alpha  
23 phase, which could potentially explain the inconsistency in 2-Hz preferred phases both within  
24 and across sessions. Specifically, we next asked whether the stimulus-driven sinusoidal  
25 modulation of hit rates could be explained better by entrained 2-Hz phase, by ongoing alpha  
26 phase, or the interaction between the two (**Fig. 6**).

27 For each gap, we determined the pre-gap 2-Hz neural phase and the pre-gap neural alpha phase  
28 and assigned each to 1 of 18 bins, as in the analyses described above. Then, 3 detection  
29 probabilities were assigned to the gap: 1) the participant-and-session-specific hit rate for the  
30 corresponding 2-Hz neural phase bin, 2) the hit rate for the corresponding alpha neural phase  
31 bin, and 3) the product of the two hit rates (i.e., the interaction; **Fig. 6a**, see Methods). Gaps  
32 were then binned by FM-stimulus phase and 3 predicted performance functions were created  
33 by averaging the predicted probabilities across all gaps within a FM-stimulus bin for the 3

1 models based on 2-Hz neural phase ( $_{pred}2Hz$ ), alpha phase ( $_{pred}\alpha$ ), and the interaction ( $_{pred}2Hz*\alpha$ )  
 2 predictions (**Fig. 6a**). Then, the true hit-rate profiles as a function of FM-stimulus phase were  
 3 correlated with the three predicted functions so that we could determine which of the  
 4 predictions most closely matched the data.

5

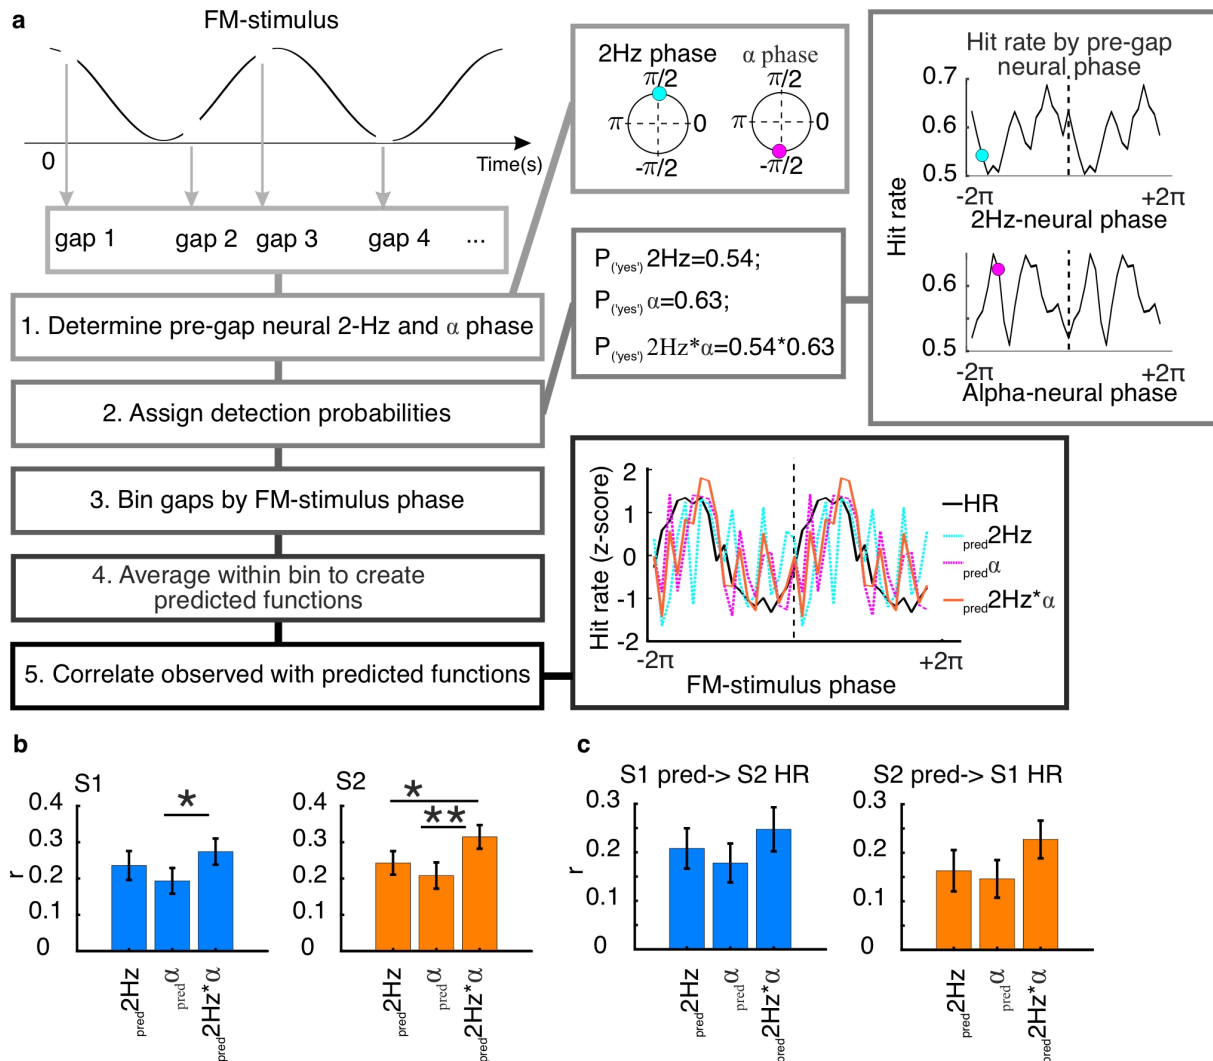

6

7

8 **Fig. 6 Predicting FM-stimulus induced behavioral modulation from 2-Hz and alpha neural phase.**

9 **(a)** For each gap, pre-gap 2-Hz and alpha neural phases were calculated and detection probabilities  
 10 ( $P_{(yes)}$ ) were assigned based on 1) the hit rate calculated for the corresponding pre-gap neural 2-Hz phase  
 11 bin, 2) the hit rate calculated for the corresponding pre-gap neural alpha phase bin, and 3) their  
 12 interaction (multiplication). Circle colors (magenta and cyan) denoting the pre-gap neural phase for the  
 13 specific gaps in step 1 correspond to the same bins marked in the average hit-rate plots in step 2. For  
 14 each FM-stimulus phase bin (18 bins), three predicted functions were calculated by averaging detection  
 15 probabilities across gaps using the 1) 2-Hz neural phase predictions, 2) the alpha neural phase  
 16 predictions and 3) their interaction. **(b)** For each participant and session, the true hit-rate profiles as a  
 17 function of FM-stimulus phase (HR) were correlated with the three predicted functions ( $_{pred}2Hz$ ,  $_{pred}\alpha$ ,  
 18  $_{pred}2Hz*\alpha$ ) so that we could determine which of the predictions most closely matched the data. Bar  
 19 graphs show the mean correlation coefficients across participants. Error bars denote standard error of  
 20 the mean. \*  $p<0.05$ , \*\*  $p<0.01$ , *Bonferroni* corrected. Note that the plots show Pearson's correlation  
 21 coefficients but statistical comparisons were performed on the fisher's r-to-z transformed values. **(c)**

1 same as in **(b)** but correlation coefficients were computed by correlating the individual hit rate by FM-  
2 stimulus phase bin observed in session 2 with the functions predicted in session 1 (S1 pred→ S2 HR,  
3 left) and by correlating the individual hit rates as a function of FM-stimulus phase bin observed in  
4 session 1 with the functions predicted in session 2 (S2 pred→ S1 HR, left).

5

6 In both sessions, observed FM-stimulus-driven modulation of hit rates significantly correlated  
7 with all predicted functions (one sample t-test on Fisher's r-to-z transformed correlation  
8 coefficients from true vs. mean correlation coefficients from surrogate data, all  $t(37) > 5.34$   $p < 2.93e-05$ ,  
9 *Bonferroni* corrected for 6 comparisons, **Fig. 6b**). No significant differences were  
10 observed between sessions for any of the predictors (uncorrected  $p > 0.37$ ). In general,  
11 correlation values were higher for  $\text{pred}2\text{Hz}*\alpha$  than for  $\text{pred}2\text{Hz}$  or  $\text{pred}\alpha$  alone, and this difference  
12 was significant for session 1 for the comparison  $\text{pred}\alpha$  vs.  $\text{pred}2\text{Hz}*\alpha$  ( $t(37) = -3.12$ ,  $p = 0.02$ ,  
13 *Bonferroni* corrected for 6 comparisons) and session 2 for  $\text{pred}2\text{Hz}$  vs.  $\text{pred}2\text{Hz}*\alpha$  ( $t(37) = -2.83$ ,  
14  $p = 0.04$ ) and  $\text{pred}\alpha$  vs.  $\text{pred}2\text{Hz}*\alpha$  ( $t(37) = -3.82$ ,  $p = 0.002$ , all *Bonferroni* corrected for 6  
15 comparisons, **Fig. 6b**).

16 In addition, we asked whether the modulation of hit rates by 2-Hz and alpha phase from one  
17 session could predict the same in the other session. Stimulus-driven behavioral modulation was  
18 significantly correlated with the predictor functions from the opposite session for all three  
19 predictors (all  $t(37) > 3.66$ ;  $p < 0.005$ , *Bonferroni* corrected for 6 comparisons, **Fig. 6c**). As  
20 before, there was a trend to higher correlation values for the interaction predictor  $\text{pred}2\text{Hz}*\alpha$   
21 compared to  $\text{pred}2\text{Hz}$  and  $\text{pred}\alpha$  although it did not survive multiple comparisons correction  
22 (predictors session 1 to HR session 2:  $\text{pred}\alpha$  vs.  $\text{pred}2\text{Hz}*\alpha$ ;  $t(37) = -2.01$ ;  $p = 0.02$ , uncorrected;  
23 predictors session 2 to HR session 1:  $\text{pred}2\text{Hz}$  vs.  $\text{pred}2\text{Hz}*\alpha$ ;  $t(37) = -2.6$ ;  $p = 0.01$ , uncorrected  
24  $\text{pred}\alpha$  vs.  $\text{pred}2\text{Hz}*\alpha$ ;  $t(37) = -2.19$ ;  $p = 0.03$ , uncorrected). Taken together, these results show  
25 that 2-Hz neural phase and alpha neural phase effects both explain the FM-stimulus induced  
26 behavioral modulation. However, the interaction between 2-Hz and alpha phase was the best  
27 predictor of behavior. Moreover, behavioral modulation could be predicted regardless of  
28 whether predictive functions were derived from the same or the opposite session, which  
29 suggests that this is also reliable across sessions.

### 30 ***Control Experiment: Gap detection is modulated by the FM rate.***

31 Here, we found that preferred FM phases were clustered in one half of the FM cycle (although  
32 we did observe some variability across participants). This was somewhat surprising because  
33 previous studies using the same stimuli and task reported preferred phases to be uniformly

1 distributed around the FM cycle (7). The one major difference between the two studies was the  
2 FM frequency: 3 Hz in the previous study (7) and 2 Hz in the current study. We hypothesized  
3 that individual variability in stimulus-driven behavioral modulation might be influenced by the  
4 FM frequency: slower FM frequencies (in this case 2 Hz) should be easier to track and therefore  
5 participants should synchronize to such stimuli more similarly, while individual differences are  
6 more pronounced for higher FM frequencies, which might be more difficult to track and  
7 therefore result in phase slips.

8 To test this hypothesis, in a control experiment, 16 participants performed the same gap-  
9 detection task as in the main experiment, but FM frequency varied between blocks and took on  
10 values of 1.5 Hz, 2 Hz, 2.5 Hz, or 3 Hz (see Methods, **Fig. S4**) Overall hit rates were  
11 significantly modulated by FM rate (repeated measures ANOVA,  $F(3,45) = 8.49$ ,  $p = 0.0001$ )  
12 with smaller hit rates observed for higher FMs (**Fig. S4a**). However, FM rate did not  
13 significantly affect the amplitude of the stimulus-induced behavioral modulation ( $F(3,45) =$   
14  $1.72$ ,  $p = 0.18$ ). Most importantly here, to test whether the clustering of individual preferred  
15 phases was dependent on the FM rate, individual preferred phases were estimated from cosine  
16 fits (**Fig. S4b**) and the resultant vector length across participants was calculated for each FM  
17 rate (**Fig. S4c**). A linear model was fitted to the resultant vector length including intercept and  
18 a linear term for FM rate as the predictor. A significant fit for the linear term would suggest  
19 that indeed, phase clustering significantly decreased (or increased) with increasing FM rate.  
20 Significance was evaluated using permutation tests. The permutation distribution was created  
21 by 1) computing resultant vector lengths over 1000 iterations (in each iteration the FM rate  
22 labels were permuted for each participant) and fitting the same linear model to the simulated  
23 vector lengths as for the original data. The t-value calculated for the effect of FM rate on vector  
24 length in the original data was compared to the distribution of t-values obtained with the  
25 permuted datasets. Using this approach, no significant effect of FM rate on vector length was  
26 observed ( $z = -0.52$ ,  $p = 0.3$ ). After visual inspection of the data, we tested a second linear  
27 model incorporating, in addition to the intercept and linear term, a quadratic term (FM rate  $^2$ ).  
28 Significance of each function was evaluated using permutation tests, as already described for  
29 the linear-only model. In brief, t-values obtained for the linear and quadratic terms were each  
30 compared to the random t-values distributions obtained, for each term, by fitting the same linear  
31 model to the shuffled datasets. The t-values from the linear and quadratic fits to the original  
32 data were significant at trend level compared to the simulated permutation distributions (linear  
33 fit:  $z = -1.61$ ,  $p = 0.054$ ; quadratic fit:  $z = 1.51$ ,  $p = 0.066$ ).



1 **Gap detection is also influenced by stimulus carrier and time of occurrence**

2 Although we tried to minimize the possibility that the FM phase effects may have unknowingly  
 3 been driven by acoustic confounds, we nonetheless tested which stimulus characteristics  
 4 beyond FM phase influenced gap-detection hit rates. Fitting logistic regression models to  
 5 individual participants data, we examined the extent to which single-trial gap detection  
 6 accuracy in the main experiment was influenced by 1) FM phase, 2) global experiment time  
 7 (when the gap occurred over the whole experiment, quantified as the gap number within a  
 8 session, 1–864), 3) local time (when the gap occurred within a stimulus), 4) the center carrier  
 9 frequency of the stimulus in which the gap was presented and 5) the interaction of FM phase  
 10 with global time (quantifying the extent to which stimulus-driven behavioral modulation  
 11 changed over the course of the experiment).

12

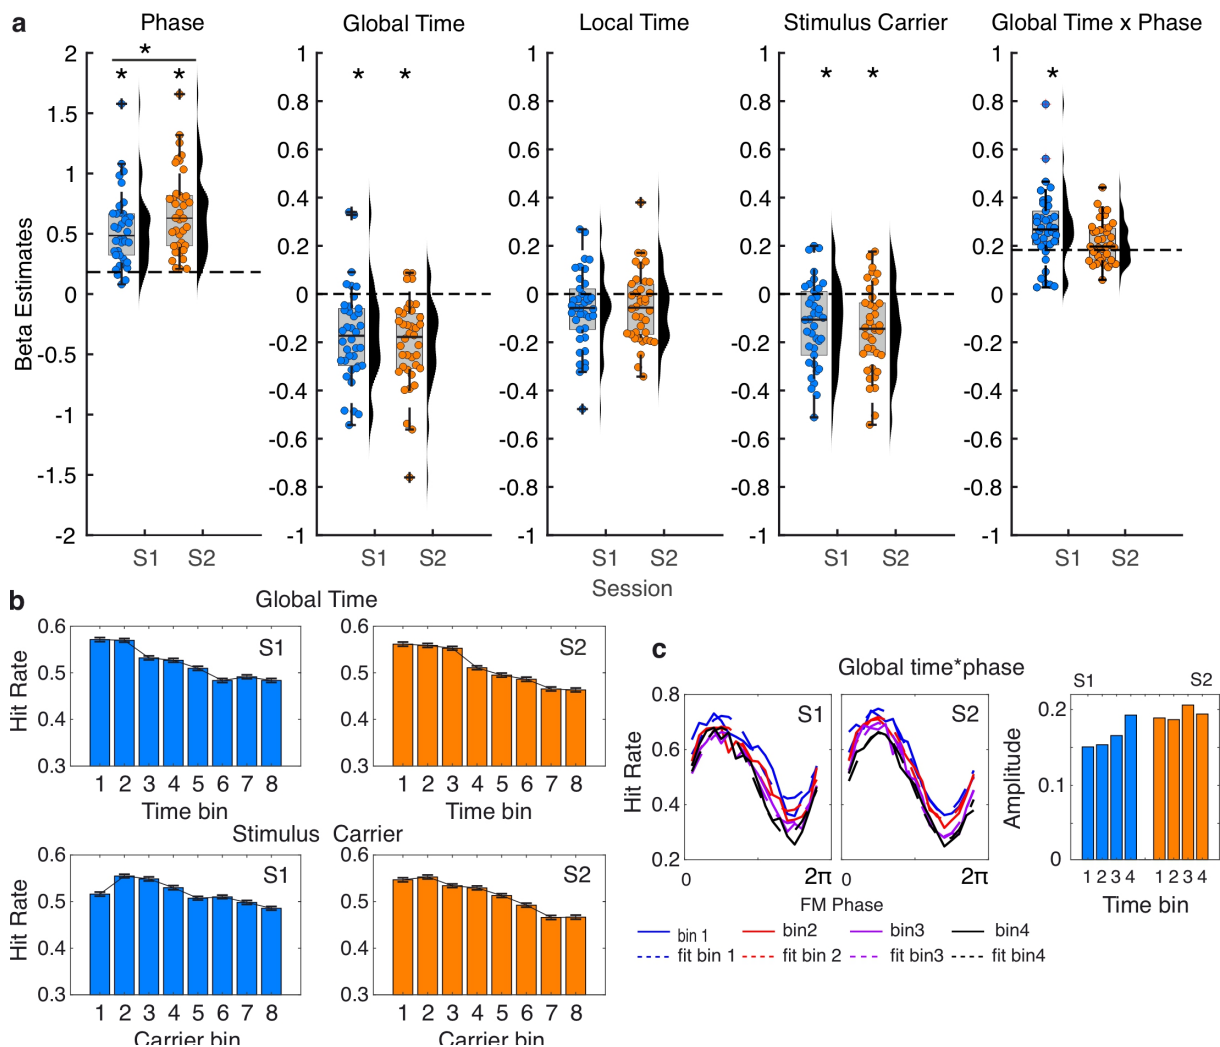

13

14

15 **Fig. 7. Effect of stimulus properties on gap detection.** (a) Distribution plots showing the beta  
 16 estimates resulting from the individual logistic regression models. (\*) denote the significant effect at the  
 17 group level for a given predictor, after performing one-sample *T*-tests compared to the mean beta  
 18 estimates for surrogate datasets. (†) denote significant difference between sessions after performing

1 paired samples T-test. All  $* < 0.05$  after *Bonferroni* correction. A significant difference between sessions  
2 was only observed for the main effect of phase, which was strongest in session 2. Box plots show median  
3 (horizontal solid black line), 25<sup>th</sup> and 75<sup>th</sup> percentiles (box border), extreme values (whiskers) and  
4 outliers (black cross). (b) Visualization of the main effects shown in (a), i.e., main effect of global time  
5 (top) and main effect of stimulus center carrier frequency (bottom). (c) Global time\*phase interaction  
6 effect. Data were grouped in 4 linearly spaced bins (1: blue; 2: red; 3: purple; 4: black) according to the  
7 time of occurrence within the session (global time). Hit rates were calculated for each bin and each FM  
8 phase (solid lines, Left). Cosine functions were fitted to each bin data (dashed lines, Left). Mean fit  
9 amplitude values are given in the bar plots in the Right. S1: session 1; S2: session 2.

10

11 Significance at the group level was estimated using one-sample (significant effect for each  
12 session) and dependent-sample (comparison between sessions) t-tests on the individual beta  
13 estimates (see Methods). One-sample t-tests were performed comparing the individual beta  
14 estimates obtained from the logistic regression on the original data with the mean beta estimates  
15 obtained when fitting the same models to surrogate datasets. For each subject, 1000 surrogate  
16 datasets were created by shuffling each time the dependent variable, single-gap accuracy values  
17 (0,1), while keeping all independent variables (stimulus parameters) fixed.

18 As already described, in both sessions, gap-detection performance was significantly modulated  
19 by FM-stimulus phase (S1:  $t(37) = 7.04$ ,  $p = 3.55e-07$ ; S2:  $t(37) = 7.42$ ,  $p = 1.1e-07$  *Bonferroni*  
20 corrected). A significant influence on hit rates was also observed, in both sessions, for global  
21 experiment time (S1:  $t(37) = -5.26$ ,  $p = 8.89e-05$ ; S2:  $t(37) = -7.06$ ,  $p = 3.33e-07$ , *Bonferroni*  
22 corrected) and the center carrier frequency of the stimulus (S1:  $t(37) = 3.77$ ,  $p = 0.008$ ,  
23 *Bonferroni* corrected). The interaction FM phase\*global time was significant only in session 1  
24 ( $t(37) > 7.84$   $p < 4.02e-08$ , *Bonferroni* corrected, **Fig. 7a**) but it did not survive correction for  
25 multiple comparisons in session 2. Significant difference between sessions was observed only  
26 for the effect of FM phase, which was strongest in session 2 ( $t(37) = -3.6$ ,  $p = 0.006$ , *Bonferroni*  
27 corrected). Regarding the main effect of the stimulus center carrier frequency, post-hoc  
28 exploration showed that hit rates decreased with increasing carrier frequency (**Fig. 7b**). The  
29 main effect of global time was explained by a decreased of hit rates over time, as it would be  
30 expected from fatigue (**Fig. 7b**). Further visual exploration of the FM phase\*global time  
31 interaction term in session 1 showed that while hit rates decreased over time within the session,  
32 the amplitude of the sinusoidal modulation increased over time. The later could represent some  
33 sort of strategy change happening within the first session, when participants were more naïve  
34 to the experiment (**Fig. 7c**). Additional logistic regression models were fitted to the individual  
35 data using other combination of parameters (e.g., including the carrier frequency at the exact  
36 time the gap was presented, taking into account the sinusoidal modulation) but such models

1 showed higher corrected Akaike's Information Criterion (AICc) values than the winning model,  
2 suggesting that they were less representative of the data (**Table S2**). Interestingly, the model  
3 with the highest AICc (and therefore worst performance) was the one including acoustic  
4 parameters but excluding FM stimulus phase information, suggesting that in fact, FM phase  
5 was the best predictor of gap detection accuracy.

6

## 7 **Discussion**

8 In the present study, we investigated the test–retest reliability of neural entrainment and its  
9 relevance for auditory perception. Participants detected silent gaps embedded in 2-Hz FM  
10 stimuli while EEG activity was recorded in two separate sessions. We showed that: 1) neural  
11 activity was entrained by the FM stimuli, and perception was modulated in a sinusoidal manner  
12 by both stimulus and brain phase; 2) both entrainment strength and the magnitude of stimulus-  
13 driven behavioral modulation were reliable across sessions; 3) pre-gap delta and alpha activity  
14 predicted moment-by-moment fluctuations in performance, within and across sessions.

### 15 *Neural entrainment is reliable over time*

16 Over the past years, a great deal of attention has been paid to entrainment, and arguments range  
17 from the existence of entrainment per se (1, 31, 32) to its role for auditory perception  
18 specifically (33-35). Neural entrainment to rhythmic stimuli has been observed across a range  
19 of sounds, including simple stimuli such as tone sequences, amplitude-modulated, or  
20 frequency-modulated sounds, and more complex auditory stimuli such as music and speech (6,  
21 7, 9, 10, 12, 13, 19, 26). However, until now, little attention has been paid to the reliability of  
22 neural entrainment. This is despite the fact that the reliability of entrainment is of paramount  
23 importance both for understanding its contribution to auditory perception and for developing  
24 effective targeted interventions. Here, we showed that neural entrainment to FM sounds is  
25 reliable over time: we observed high inter-session correlations for metrics of entrainment  
26 strength, such as the spectral amplitude of neural activity at the stimulus frequency, and perhaps  
27 more importantly, the phase lag between stimulus and brain. The fact that entrainment  
28 signatures are stable over time (at least for FM sounds) confirms that rhythmic auditory  
29 stimulation is a valid tool for the external manipulation of narrow-band brain activity and as  
30 such might be useful for restoring or facilitating oscillatory brain dynamics (36, 37). Moreover,  
31 rhythmic auditory stimulation could be used to test the causal role of brain rhythms for different  
32 brain functions, either alone or in combination with other non-invasive stimulation techniques

1 (e.g., transcranial alternating current stimulation or transcranial magnetic stimulation);  
2 manipulating the relationship between the FM stimulus and the electrical stimulation could in  
3 principle be used as a direct manipulation between the electrical manipulation and brain  
4 activity.

### 5 *Entrained delta and ongoing alpha activity influenced gap-detection performance*

6 Here, we observed that trial-by-trial gap-detection performance was mainly predicted by pre-  
7 gap neural 2-Hz phase. Moreover, both delta and alpha phase predicted the observed FM-driven  
8 behavioral modulation, with their interaction providing stronger predictive power than either  
9 predictor considered alone. These results are in line with previous studies showing that the  
10 phase of neural oscillations prior to target occurrence predicts perception in different sensory  
11 domains (8, 38-41). For example, enhanced detection or faster reaction times have been  
12 reported for sensory stimuli presented at the optimal phase of delta (42), theta (43, 44), or alpha  
13 oscillations (39, 44). Our results also showed that, in a rhythmic listening context, gap-detection  
14 performance was not just a product of the entrained delta activity but also depended on non-  
15 entrained (ongoing) alpha activity. Comodulation of behavior by different frequencies have  
16 previously been reported (6). Critically, such comodulation was specific to the entrained  
17 frequencies, which led the authors to conclude that environmental rhythms reduce  
18 dimensionality of neural dynamics. Here we expand this view by showing that both entrained  
19 and ongoing brain oscillations could potentially comodulate behavioral performance. We  
20 interpret the contributions of both entrained and ongoing activity to perception as potentially  
21 reflecting an interplay between stimulus driven (sensory, bottom-up) and internally driven (top-  
22 down) processes. Although our paradigm was not designed to provide a time-resolved look at  
23 the interplay between delta and alpha oscillations, our results are consistent with alternating  
24 influences that might occur as a result of “lapses” of entrainment during which alpha  
25 oscillations might have a stronger effect on perception (10). It is possible that when entrainment  
26 is high, auditory perception is mostly modulated by the entrained activity, however, during  
27 entrainment lapses, perception is shaped by internal ongoing activity. Or conversely,  
28 participants could have adopted the strategy of trying to ignore the rhythm in order to perform  
29 the task, but as their alpha-attention system lapsed, they were forced into a rhythmic-  
30 entrainment mode.

31 Quite a bit of previous work has demonstrated the importance of alpha activity for “gating”  
32 near-threshold stimuli into awareness (8, 45), which goes beyond the idea of alpha activity  
33 indexing lapses of entrainment. However, the vast majority of these studies have been

1 conducted in the visual modality (46-48), and it has been argued that alpha activity does not  
2 contribute to near-threshold auditory perception (49). Thus, one open question relates to the  
3 precise role of alpha oscillations in shaping near-threshold auditory perception, in particular in  
4 a rhythmic auditory context. Answering this question requires respecting the observation of  
5 different alpha rhythms with different neural generators (e.g., (50-53)). Moreover, several  
6 studies linking alpha oscillations to attention have suggested that alpha oscillations could play  
7 at least two different roles: i.e., a facilitatory role where it can enhance target processing, or a  
8 suppressive role where alpha activity can suppress the processing of distractors (54-56). We  
9 hypothesize that the alpha-phase effect observed in our study is reflecting something like  
10 distractor suppression. While delta oscillatory activity entrained to the FM stimulus facilitates  
11 target processing at the optimal delta phase, we speculate that ongoing alpha activity might play  
12 a role in suppressing the distracting stimulus itself (complex noise), in an attempt to also  
13 maximize target detection. In this case, stimulus-induced sinusoidal behavioral modulation  
14 would be best predicted by the interaction of both mechanisms, in line with the current results.

#### 15 ***Behavioral entrainment consistency depends on modulation rate***

16 In the current study, we were surprised to observe that the preferred *stimulus* phase that yielded  
17 best gap-detection performance was consistent across participants. In previous work, preferred  
18 stimulus phase was uniformly distributed across participants, and this observation was critical  
19 to our argument that stimulus-driven behavioral modulation was the result of neural  
20 entrainment and not an artifact of stimulus acoustics (7). The primary difference between the  
21 current study and previous work was the FM rate, which was slower here (2 Hz) than in previous  
22 work (3 Hz). This led us to conduct a control experiment where we examined gap-detection  
23 performance for stimuli with FM rates varying between 1.5 and 3 Hz (in 0.5-Hz steps). We  
24 found that preferred phase became less consistent as FM rate increased (but only when a  
25 quadratic term was also included as a predictor).

26 Humans prefer to listen to and interact with auditory stimuli that are characterized by rhythmic  
27 structure in delta band, with a mode around 2 Hz (57-60). This rate overlaps with the modal  
28 periodicities of the human body (61), the most common period for the beat rate in Western  
29 music (61), and to common speech rates as quantified by inter-stress and inter-word levels in a  
30 variety of languages (62) and EMG data during speaking (63). We hypothesize that because the  
31 2-Hz stimuli in the current study better aligned with preferred rate for humans, they may have  
32 been more consistently tracked by listeners compared to faster stimuli that were less likely to  
33 correspond to preferred rates and may have led to more phase slips / precession (64) and

1 therefore less consistency across participants. We note that there is evidence that favored rates  
2 for different types of stimuli may differ (e.g., speech vs. music (65); auditory vs. visual rhythms  
3 (66, 67)). Moreover, behavioral preferred rates change over the lifespan (60, 68), as does neural  
4 entrainment to different stimuli (FM/AM) (26). Human participants also differ in their output  
5 frequency e.g., when asked to talk or tap at a comfortable rate (69, 70), which is interpreted as  
6 individual differences in optimal frequencies for producing or processing incoming sensory  
7 information. The interaction between stimulus rate and individual differences in neural  
8 oscillator properties, including resonance frequency, is still a matter for empirical work.  
9 However, the results of our behavioral study, taken together with previous behavioral (60) and  
10 electrophysiological work (63, 64) suggest that neural entrainment is more successful and  
11 consistent when stimulus rates more closely match individual preferred rates.

## 12 ***Conclusion***

13 Taken together, our results showed that FM stimuli entrained neural activity and sinusoidally  
14 modulated near-threshold target detection: both signatures of entrainment as well as its  
15 behavioral consequences were reliable across sessions. This demonstration is a critical  
16 prerequisite for research lines focused on targeted interventions for entrainment but has to our  
17 knowledge gone untested until now. Moreover, gap-detection performance was predicted by  
18 entrained neural delta phase, ongoing alpha phase and their interaction, suggesting that delta  
19 and alpha phase underpin different but potentially simultaneously active neural mechanisms  
20 and together shape perception.

21

## 22 **Methods**

### 23 **Main experiment**

#### 24 ***Participants***

25 **Main study.** Forty-one healthy participants took part in the study. Three participants were  
26 excluded from further analysis due to noisy EEG data (1 participant) and poor task performance  
27 (i.e., detection rate  $< 0.25$ , 2 participants). Results presented in this manuscript include data from  
28 38 participants (21 females, four left-handed, mean age: 26.03 with SD = 4.6 years old). Each  
29 participant took part in two sessions separated by 2–42 days (median: 7 days). All participants  
30 self-reported normal-hearing and normal or corrected-to-normal vision. All participants were  
31 either native German speakers (n=37) or spoke German with high proficiency (n=1). At the

1 time of the experiment no participant was taking medication for any neurological or psychiatric  
2 disorder.

3 Participants received financial compensation for their participation in the study. Written  
4 informed consent was obtained from all participants. The procedure was approved by the Ethics  
5 Council of the Max Planck Society and in accordance with the declaration of Helsinki.

## 6 *Stimuli*

7 Auditory stimuli were generated by MATLAB software at a sampling rate of 44,100 Hz.  
8 Stimuli were 20-s long complex tones frequency modulated in at a rate of 2 Hz and a center-to-  
9 peak depth of 67% (**Fig. 1**). The center frequency for the complex carrier signals was randomly  
10 chosen for each stimulus within the range of 1000-1400Hz. The complex carrier comprised 30  
11 components sampled from a uniform distribution with a 500-Hz range. The amplitude of each  
12 component was scaled linearly based on its inverse distance from the center frequency; that is,  
13 the center frequency itself was the highest-amplitude component, and component amplitudes  
14 decreased with increasing distance from the center frequency. The onset phase of the stimulus  
15 was randomized from trial to trial, taking on one of eight values ( $0, \pi/4, \pi/2, 3\pi/4, \pi, 5\pi/4, 3\pi/2,$   
16  $7\pi/4$ ) with the constraint that each trial would always start with a phase different to its  
17 predecessor. All stimuli were rms amplitude normalized. Three, four, or five silent gaps were  
18 inserted into each 20-s stimulus (gap onset and offset were gated with 3-ms half-cosine ramps)  
19 without changing the duration of the stimulus. Each gap was chosen to be centered in 1 of 18  
20 equally spaced phase bins into which each single cycle of the frequency modulation was  
21 divided. No gaps were presented either in the first or the last second of the stimulus. A minimum  
22 of 1.5 s separated consecutive gaps.

## 23 *Procedure*

24 The experiment was conducted in an electrically shielded and acoustically isolated chamber  
25 and under normal-illumination conditions. Sound-level thresholds were determined for each  
26 participant according to the method of limits. All stimuli were then presented at 55 dB above  
27 the individual hearing threshold (55 dB sensation level, SL).

28 Gap duration was individually adjusted to detection threshold levels using an adaptive-tracking  
29 procedure comprising two interleaved staircases and a weighted up-down technique with  
30 custom weights. During this procedure, participants detected a gap within a 4-s sound. Except  
31 for the duration, the sound had the same characteristics as in the main experiment. The

1 descending staircase started with a gap duration of 150 ms and the ascending staircase started  
2 with a gap duration of 1 ms. If the participant detected the gap, gap duration was decreased by  
3 some percent (5% for  $10 \text{ ms} \leq \text{gaps} \leq 35 \text{ ms}$ , 20% for  $35 \text{ ms} < \text{gaps} \leq 70 \text{ ms}$ , or 50% for  $70 \text{ ms}$   
4  $< \text{gaps} \parallel \text{gaps} < 10 \text{ ms}$ ) in the following trial of the current staircase. On the contrary, if the  
5 participant did not detect the gap, gap duration was increased by some percent (following the  
6 same convention as before) of the current gap duration, in the following trial of the current  
7 staircase. Each staircase ended when four reversals occurred in a span of six trials. The mean  
8 final gap duration across the two staircases was chosen for presenting the gaps in the main task.

9 Before starting the main experiment, participants performed practice trials to make sure they  
10 understood the task. For the main experiment, EEG was recorded while listeners detected gaps  
11 embedded in the 20-s long FM stimuli. Listeners were instructed to respond as quickly as  
12 possible when they detected a gap via button-press. Overall, each listener heard 216 stimuli (27  
13 per starting phase). The number of gaps per stimulus was counterbalanced (72 stimuli each  
14 included 3 gaps, 4 gaps, and 5 gaps) for a total of 864 gaps. For each of the 18 FM-phase bins,  
15 48 gaps were presented. Including the EEG preparation, each experimental session lasted about  
16 3 hours.

### 17 *Data Acquisition and Analysis*

18 **Behavioral data.** Behavioral data were recorded online by MATLAB 2017a (MathWorks) in  
19 combination with Psychtoolbox. Sounds were presented at a rate of 44.1kHz, via an external  
20 soundcard (RME Fireface UCX 36-channel, USB 2.0 & FireWire 400 audio interface) using  
21 ASIO drivers. Participants listened to the sounds via over-ear headphones (Beyerdynamic DT-  
22 770 Pro 80 Ohms, Closed-back Circumaural Dynamic Diffuse field equalization Impedance:  
23 80 Ohm SPL: 96 dB Frequency range: 5–35,000 Hz). Button presses were collected using a  
24 Cedrus response pad (RB-740). Hits were defined as button-press responses that occurred no  
25 earlier than 100 ms and no later than 1.5 s after the occurrence of a gap. Hit rates and RTs were  
26 calculated separately for each of the 18 FM-phase bins. To estimate the FM-induced sinusoidal  
27 modulation of gap detection behavior, a cosine function was fitted to hit rates as a function of  
28 FM-phase for each participant and each session. From the fitted function, the amplitude  
29 parameter quantifies the strength of behavioral modulation by 2-Hz FM phase, while the phase  
30 parameter indexes the FM-stimulus–brain lag. Significance of the sinusoidal modulation was  
31 tested using a permutation approach, whereby 1000 surrogate datasets were created for each  
32 participant and session by shuffling the single-gap accuracy values (0,1) with respect to their  
33 stimulus-condition labels. Cosine functions were also fitted to the surrogated datasets. Each



1 participant's amplitude parameter was converted to z-score using the mean and standard  
2 deviation of the individual participant surrogate datasets. Gap detection was considered to be  
3 sinusoidally modulated for each participant if the z-score of the fitted amplitude parameter  
4 exceeded  $z = 3.2$  (i.e.,  $p < 0.05$ , *Bonferroni* corrected for 76 comparisons -i.e., 38 subjects x two  
5 sessions). Preferred FM-phase was defined as the instantaneous phase of the fitted function  
6 with the highest hit rate.

7 In order to test the effect of stimulus characteristics and time on gap detection, logistic  
8 regression models were fitted individually for each participant and session using the MATLAB  
9 function '*fitglm*', using binomial distribution and logit as the link function. Collinearity between  
10 regressors was assessed using the MATLAB function "*collintest*". Different models were tested  
11 evaluating whether gap detection could be predicted as a function of 1) FM-phase, 2) stimulus  
12 center carrier frequency (1000-1400Hz), 3) stimulus center carrier at gap onset, 4) global time  
13 (1-864, indicating the gap position within the whole experiment), 5) local time (1-12 time bins,  
14 indicating gap location within the 20-s stimulus) and the interactions of 6) FM-phase by  
15 stimulus center carrier frequency, 7) FM-phase by global time and 8) FM-phase by local time.  
16 Five different models were fitted, each including a different combination of regressors (Table  
17 S2) and the best model was selected using the Akeike's information criterium corrected for  
18 small samples (AICc). Before running the models, all predictors involving circular data (phase  
19 angles) were linearized by calculating their sine and cosine. The overall beta estimate for the  
20 final predictor (b) was then calculated by combining the beta estimates of the sine (sinb) and  
21 cosine (cosb) predictors:

$$22 \quad b = \sqrt{(\sin b^2 + \cos b^2)}$$

23 To test the effect of each predictor at the group level, 1000 surrogate datasets were created for  
24 each participant and session by shuffling the single-gap accuracy values (0,1) while keeping  
25 the stimulus conditions the same. The same regression models were fitted to the surrogate  
26 datasets and the mean beta estimate for each regressor was taken as the random distribution  
27 mean. One-sample *t-tests* against the random distribution mean were conducted to assess the  
28 significance of each regressor at the group level, separately for each session. Dependent sample  
29 *t-tests* were conducted to compare between sessions. *P-values* were corrected for multiple  
30 comparisons using *Bonferroni* method.

31 **Control study.** Sixteen participants took part in the control experiment (12 females, mean age  
32 27.1 (SD = 5)). Ten participants had also been recruited for the main study, they received

1 financial compensation and signed written informed consent. The other six participants were  
2 colleagues in our research group (including one author-YCC) and participated voluntarily  
3 without compensation).

4 Unless otherwise specified, stimuli and procedures were defined as for the main experiment. In  
5 contrast to the main experiment, gap thresholds were not individually defined but gap duration  
6 was fixed at 16 ms (mean threshold in session 2 in the main experiment) for all participants.  
7 FM-stimuli were created as for the main experiment but modulated at four different frequencies,  
8 i.e., 1.5, 2, 2.5, and 3 Hz. Gaps could be presented at 15 different bins of the FM cycle. Subjects  
9 heard 224 stimuli (56 per FM) for a total of 932 gaps (233 per FM rate). Stimuli were presented  
10 in 8 different blocks (2 per FM rate) of 28 stimuli each. Each block comprised only one FM  
11 rate but the FM order was randomized within session and across participants. The number of  
12 gaps per stimulus (3, 4, or 5) was randomized. For each of the 15 FM-phase bins\*FM rate  
13 combination, 14-16 gaps were presented.

14 Hits were defined as button-press responses that occurred no earlier than 100 ms and no later  
15 than 1.5 s after the occurrence of a gap. Hit rates were calculated separately for each of the 15  
16 FM-phase bins and each FM rate. To estimate the FM-induced sinusoidal modulation of gap  
17 detection behavior, a cosine function was fitted to hit rates as a function of FM-phase for each  
18 participant. For each participant and FM rate, the mean hit rate (i.e., fitted intercept), the fitted  
19 amplitude parameter and the preferred phase (same definition as in the main experiment) were  
20 estimated. The effect of FM rate on hit rates and amplitude parameters was tested using a one-  
21 way Analysis of Variance (ANOVA). To test whether individual preferred phases were more  
22 randomly distributed with increasing FM rate, resultant vector lengths were computed for each  
23 FM rate using the individual preferred phases. Two linear models were fitted to the resultant  
24 vector length by FM rate data. The first one included intercept and linear (FM rate) terms while  
25 to second also included a quadratic term (FM <sup>2</sup>). Both models were fitted to the data using the  
26 Matlab function “*fitglm*” and statistical significance was estimated using permutation tests. For  
27 comparison, the test distribution was created by computing 1000 resultant vector lengths  
28 calculated with the individual preferred phases while swapping the FM rate information at the  
29 individual level.

30 **Electroencephalogram data.** The EEG was recorded with an actiCAP active electrode system  
31 in combination with Brainamp DC amplifiers (Brain Products GmbH). The electrode system  
32 included 64 Ag–AgCl electrodes mounted on a standard cap, actiCAP 64Ch Standard-2 (Brain  
33 Products GmbH). Signals were recorded continuously with a passband of 0.1 to 1000 Hz and

1 digitized at a sampling rate of 1000 Hz. For recording, the reference electrode was placed over  
2 FCz and the ground electrode over AFz. For better stimulus marking, in addition to standard  
3 EEG triggers from the LPT port, stimulus markers were also sent via soundcard and collected  
4 in the EEG using a Stimtrak (Brain Products GmbH). Electrode resistance was kept under 20  
5 k $\Omega$ . All EEG data were analyzed offline by using Fieldtrip software  
6 ([www.ru.nl/fcdonders/fieldtrip](http://www.ru.nl/fcdonders/fieldtrip); version 20200130), and custom MATLAB scripts.

7 Two different preprocessing pipelines were implemented. One was tailored to assess  
8 entrainment characteristics and reliability and focused on the complete 20-s stimulus periods;  
9 the second pipeline was tailored to test the effect of pre-target (pre-gap) activity on gap  
10 detection, and focused on the periods around the gap's occurrence. In the first preprocessing  
11 pipeline, the continuous EEG data were high-pass filtered at 0.6 Hz. Filtered data were then  
12 epoched into 21.5-s trials (1 s before stimulus onset and 0.5 s after stimulus offset). The trial  
13 data were low-pass filtered at 80 Hz and the 50 Hz line noise was removed using discrete  
14 Fourier transform (dft) with spectrum interpolation as implemented in Fieldtrip. Data were re-  
15 referenced to the average reference. Extreme artifacts were removed based on visual inspection.  
16 Noisy electrodes were then interpolated (1 electrode in 3 participants and 2 electrodes in one  
17 participant). Eye-blinks, muscle, heartbeat, and remaining line noise or faulty contact artifacts  
18 were removed using ICA. Next, data were low pass filtered to 30 Hz and trials for which the  
19 range exceeded 200  $\mu$ V were automatically removed. If more than 30% of the trials had to be  
20 removed because of artifacts, the participant was removed for further analysis (1 participant).  
21 Preprocessed data were resampled to 500 Hz.

22 The second preprocessing pipeline included the same steps excepting the initial high-pass filter.  
23 To maximize comparability with the first pipeline, all the same trials and ICA components that  
24 were identified based on the first pipeline were removed in the second pipeline. After all  
25 preprocessing steps and before resampling, 3 s long trials were defined around each gap onset  
26 (i.e., 1.5 s before and 1.5 s after gap onset). Trials exceeding a range of 200  $\mu$ V were excluded  
27 and data were resampled to 500 Hz.

28 *Frequency and time-frequency analysis of full-stimulus periods.* Full-stimulus epochs were  
29 analyzed in the frequency and time-frequency domains to examine brain responses entrained  
30 by the 2-Hz stimulation. Since the starting phase of the FM stimulus was randomized from trial  
31 to trial, before conducting frequency-domain analyses, single-trial brain responses were  
32 realigned so that the FM stimulus phases would be perfectly phase-locked across trials after the  
33 realignment. A fast Fourier transform (FFT) was performed on the trial-averaged time-domain

1 data, after multiplication with a Hann window. Evoked amplitude in each frequency band was  
2 calculated as the absolute value of the complex output, while the phase angle of the complex  
3 FFT output at 2 Hz provided an estimate of stimulus-brain phase lag. An FFT was also applied  
4 on each single trial, and the resulting single-trial amplitude spectra were averaged over trials as  
5 an indicator of total amplitude of neural activity that was not necessarily phase-locked to the  
6 stimulus. Inter-trial phase coherence (ITPC) was calculated as the resultant vector length of  
7 phase angles from the complex FFT output across trials separately for each frequency and  
8 electrode. In addition, the single-trial time-domain data were submitted to a time–frequency  
9 analysis by using the Fieldtrip-implemented version of the Wavelet approach using Fourier  
10 output. Here, wavelet size varied with frequency linearly from three to seven cycles over the  
11 range from 1 to 15 Hz. The resulting complex values were used to estimate time-resolved ITPC  
12 for each channel separately.

13 To statistically test spectral amplitudes and ITPC at frequencies of interest (2 Hz, 4 Hz, alpha),  
14 nonparametric Wilcoxon signed rank test (in session 1: for 4 Hz ITPC; in session 2: for 2 Hz  
15 amplitude and ITPC and for alpha amplitude) or the parametric equivalent paired-samples *t*-  
16 tests (all other comparisons) were conducted, based on satisfaction of normality assumptions;  
17 whether to use parametric or non-parametric tests for comparisons was decided based whether  
18 the data was normally distributed or not according to the Lilliefors test implementation in  
19 MATLAB (function ‘*lillietest*’). For each condition, participant, and session, data were  
20 averaged over all channels (and over time for time-resolved ITPC) and amplitudes/ITPC of the  
21 two target frequencies (2 Hz and 4 Hz) were then tested against the average amplitude/ITPC of  
22 the neighboring  $\pm 8$  frequency bins (0.16Hz) similar to (7, 27). In the case of alpha amplitude,  
23 data were averaged across all bins including frequencies between 7-12 Hz and were tested  
24 against the average amplitude of the neighboring  $\pm 100$  frequency bins (2 Hz).

25 Based on the topography of the 2/4 Hz and alpha (7-12 Hz) amplitude spectra, further analyses  
26 involving the extraction of phase and/or amplitude values were done in a cluster of electrodes  
27 including *F3, Fz, F4, FC1, FC2, C3, Cz, C4, F1, F2, FC3, FC4, C1, C2* for 2/4 Hz activity and  
28 *P8, P6, P4, P2, Pz, P1, P3, P5, P7, PO9, PO10, PO8, PO4, POz, PO3, PO7, O1, Oz, O2* for  
29 alpha activity.

30 *Pre-gap activity.* Before analysis of pre-gap activity, single-trial time-domain data around the  
31 gap period (1.5 s before and 1.5 s after) were detrended (using linear regression). It is possible  
32 that the smearing of the evoked response back into pre-stimulus period by wavelet convolution  
33 could produce spurious pre-stimulus phase effects. To minimize this, gap-evoked responses

1 were removed from the post-stimulus period by multiplication with half of a Hann window that  
2 ranged between 0 and 50 ms after gap onset and was zero thereafter (6). Next, we applied two  
3 different analysis approaches to quantify neural phase and neural amplitude in the pre-gap time  
4 window. To estimate neural amplitude, the time-domain data were submitted to a wavelet  
5 convolution using Fourier output as implemented in Fieldtrip. Wavelet size varied with  
6 frequency linearly from three to seven cycles over the range from 1 to 15 Hz with 10 ms  
7 temporal resolution. Alpha amplitude as well as 2-Hz amplitude were averaged within the 100-  
8 ms time window preceding gap onset.

9 For extracting the pre-gap instantaneous 2 Hz and alpha phase, single-trial data were first band-  
10 pass filtered using a Butterworth filtered as implemented in Fieldtrip (1.5.-2.5 Hz for 2 Hz  
11 activity and 7-12 Hz for alpha activity). Filtered data were subjected to a Hilbert transform and  
12 the phase angle was computed. Time windows for extracting pre-gap 2 Hz and alpha phases  
13 were adjusted to include 1/5 of a cycle of the relevant frequency, i.e., 100 ms preceding gap  
14 onset for 2 Hz phase and 22 ms for alpha (assuming center frequency 9 Hz) phase.

15 The influence of the instantaneous 2-Hz phase and amplitude, alpha phase and amplitude, and  
16 2-Hz–alpha phase amplitude coupling (PAC) in the pre-gap period on gap detection was  
17 evaluated using logistic regression models at the single-participant level, similar to the  
18 behavioral analysis using the MATLAB function *'fitglm'*, specifying the distribution as  
19 binomial and the link function as logit. Collinearity between regressors was assessed using the  
20 MATLAB function “collintest”. Six different logistic regression models were fitted to the data  
21 including a different combination of the regressors mentioned above and the best model was  
22 chosen based on the AICc value (**Table S1**). To test the effect of each predictor at the group  
23 level, 1000 surrogate datasets were created for each participant and session by shuffling the  
24 single-gap accuracy values (0,1) across trials while keeping the regressors the same. The same  
25 regression models were fitted to the surrogate datasets and the mean beta estimate for each  
26 regressor was taken as the random distribution mean. One-sample *t-tests* against the random  
27 distribution mean were conducted to assess the significance of each regressor at the group level,  
28 separated by session. Dependent sample *t-tests* were conducted to compare between sessions.  
29 *P-values* were corrected for multiple comparisons using *Bonferroni* method.

30 To investigate optimal 2-Hz phase angle for gap detection, trials were sorted according to the  
31 pre-gap 2-Hz phase angles (grouped in 18 equally spaced phase bins) and hit rates were  
32 calculated for each bin. Similarly, to estimate optimal alpha phase angle for gap detection, trials  
33 were sorted according to the pre-gap alpha phase angles (grouped in 18 equally spaced phase

1 bins) and hit rates were calculated for each bin. Phase lag was estimated based on a cosine fit  
2 to hit rates binned by either delta or alpha phase. Separately for delta and alpha, best neural  
3 phase was defined as the phase with highest detection rate as estimated from the cosine fit.

4 *Predicting FM-stimulus driven sinusoidal behavioral modulation from neural phase effects.*

5 Three detection probabilities were assigned to each gap: 1) the hit rate calculated for the pre-  
6 gap neural 2-Hz phase bin into which the gap fell, 2) the hit rate calculated for the pre-gap  
7 neural alpha phase bin into which the gap fell, and 3) the interaction of the two (their product,  
8 **Fig. 6a**). Then, gaps were sorted and binned based on their FM-stimulus phase bin (18 bins),  
9 and three predicted functions were calculated by averaging the predicted hit rates across gaps  
10 in each bin. Pearson correlation coefficients were computed between the true individual  
11 observed hit rates by FM-stimulus phase bin and each function predicted in the same session  
12 (within session prediction) or in the opposite session (inter-session prediction). For statistical  
13 analysis, 1000 surrogate datasets per subject and session were created by shuffling the bin labels  
14 in the true hit-rate by FM-stimulus profiles. As with the true profiles, each predicted function  
15 was correlated with the surrogate hit-rate by phase bin profile from the same (within session  
16 prediction) and the opposite session (inter-session prediction). Before further analyses, all  
17 correlation coefficients were z-scored using Fisher's r-to-z transformation. For each predicted  
18 function, statistical significance was estimated using one-sample t-test (comparing each  
19 predictor vs. the mean Fisher's z-score from the surrogate data analysis). Significant difference  
20 between sessions and predictors were estimated using paired-samples t-tests. All p-values were  
21 corrected using *Bonferroni* method.

## 22 **Questionnaires**

23 To evaluate musical skills, all participants from the main experiment complete the Goldsmiths  
24 Musical Sophistication Index (Gold-MSI) (30). Scores were computed using the documents  
25 and templates provided in <https://www.gold.ac.uk/music-mind-brain/gold-msi/download/>.  
26 Accordingly, individual scores were extracted indexing five main factors (i.e., active  
27 engagement, perceptual abilities, musical training, emotions, singing abilities) and the general  
28 sophistication index.

## 29 **Statistical Analysis**

30 Prior to any statistical analysis, data normality was tested using the Lilliefors normality test in  
31 MATLAB. Parametric or equivalent non-parametric tests were then chosen to test for

1 significant differences or correlations between variables. The test showed a significant  
2 deviation from normality for the false alarms and final gap size, accordingly non parametric  
3 tests were chosen to test for correlation (Spearman) and significant difference between sessions  
4 (Wilcoxon signed rank test). Unless otherwise specified in the text, all other correlation  
5 analyses were done using Pearson correlation coefficient for linear variables and circular-  
6 circular or circular-linear correlation when circular data were involved. Significant difference  
7 between sessions were tested using one-sample or dependent-samples *t-test* when normality  
8 assumptions were satisfied. For performing statistical comparisons on correlation coefficients,  
9 coefficients were always z-scored using the Fisher's r-to-z transformation method. Unless  
10 otherwise specified, significant p-values were corrected using *Bonferroni* method.

## 11 **Acknowledgements**

12 We thank Nicole Huizinga for helping with the data collection. We thank Hanna Kadel,  
13 Dominik Thiele, and Johannes Messerschmidt for technical support and for helping with the  
14 EEG preparation and participants recruitment. We also thank Cornelius Abel for technical  
15 support. This work was supported by an ERC Starting Grant (BRAINSYNC) awarded to MJH.

## 16 **Author contributions**

17 YCC designed the study, collected and analyzed the data, and wrote the manuscript. MJH  
18 designed the study, supervised data analysis and wrote the manuscript. Both authors agree with  
19 the final version of the manuscript.

## 20 **Competing interests**

21 The authors declare no competing interest.

## 22 **References**

- 23 1. Obleser J, Kayser C. Neural Entrainment and Attentional Selection in the Listening  
24 Brain. *Trends Cogn Sci.* 2019;23(11):913-26.
- 25 2. Lakatos P, Karmos G, Mehta AD, Ulbert I, Schroeder CE. Entrainment of neuronal  
26 oscillations as a mechanism of attentional selection. *Science.* 2008;320(5872):110-3.
- 27 3. Giraud AL, Poeppel D. Cortical oscillations and speech processing: emerging  
28 computational principles and operations. *Nat Neurosci.* 2012;15(4):511-7.
- 29 4. Lakatos P, Shah AS, Knuth KH, Ulbert I, Karmos G, Schroeder CE. An oscillatory  
30 hierarchy controlling neuronal excitability and stimulus processing in the auditory cortex. *J*  
31 *Neurophysiol.* 2005;94(3):1904-11.
- 32 5. Buzsaki G, Draguhn A. Neuronal oscillations in cortical networks. *Science.*  
33 2004;304(5679):1926-9.

- 1 6. Henry MJ, Herrmann B, Obleser J. Entrained neural oscillations in multiple frequency  
2 bands comodulate behavior. *Proc Natl Acad Sci U S A*. 2014;111(41):14935-40.
- 3 7. Henry MJ, Obleser J. Frequency modulation entrains slow neural oscillations and  
4 optimizes human listening behavior. *Proc Natl Acad Sci U S A*. 2012;109(49):20095-100.
- 5 8. Mathewson KE, Prudhomme C, Fabiani M, Beck DM, Lleras A, Gratton G. Making  
6 waves in the stream of consciousness: entraining oscillations in EEG alpha and fluctuations in  
7 visual awareness with rhythmic visual stimulation. *J Cogn Neurosci*. 2012;24(12):2321-33.
- 8 9. Ten Oever S, Schroeder CE, Poeppel D, van Atteveldt N, Mehta AD, Megevand P, et  
9 al. Low-Frequency Cortical Oscillations Entrain to Subthreshold Rhythmic Auditory Stimuli. *J*  
10 *Neurosci*. 2017;37(19):4903-12.
- 11 10. Lakatos P, Barczak A, Neymotin SA, McGinnis T, Ross D, Javitt DC, et al. Global  
12 dynamics of selective attention and its lapses in primary auditory cortex. *Nat Neurosci*.  
13 2016;19(12):1707-17.
- 14 11. Garcia-Rosales F, Beetz MJ, Cabral-Calderin Y, Kossl M, Hechavarria JC. Neuronal  
15 coding of multiscale temporal features in communication sequences within the bat auditory  
16 cortex. *Commun Biol*. 2018;1:200.
- 17 12. Doelling KB, Arnal LH, Ghitza O, Poeppel D. Acoustic landmarks drive delta-theta  
18 oscillations to enable speech comprehension by facilitating perceptual parsing. *Neuroimage*.  
19 2014;85 Pt 2:761-8.
- 20 13. Doelling KB, Poeppel D. Cortical entrainment to music and its modulation by expertise.  
21 *Proc Natl Acad Sci U S A*. 2015;112(45):E6233-42.
- 22 14. Zion Golumbic EM, Ding N, Bickel S, Lakatos P, Schevon CA, McKhann GM, et al.  
23 Mechanisms underlying selective neuronal tracking of attended speech at a "cocktail party".  
24 *Neuron*. 2013;77(5):980-91.
- 25 15. Horton C, Srinivasan R, D'Zmura M. Envelope responses in single-trial EEG indicate  
26 attended speaker in a 'cocktail party'. *J Neural Eng*. 2014;11(4):046015.
- 27 16. Horton C, D'Zmura M, Srinivasan R. Suppression of competing speech through  
28 entrainment of cortical oscillations. *J Neurophysiol*. 2013;109(12):3082-93.
- 29 17. Brodbeck C, Jiao A, Hong LE, Simon JZ. Neural speech restoration at the cocktail party:  
30 Auditory cortex recovers masked speech of both attended and ignored speakers. *PLoS Biol*.  
31 2020;18(10):e3000883.
- 32 18. Zoefel B, Archer-Boyd A, Davis MH. Phase Entrainment of Brain Oscillations Causally  
33 Modulates Neural Responses to Intelligible Speech. *Curr Biol*. 2018;28(3):401-8 e5.
- 34 19. Riecke L, Formisano E, Sorger B, Baskent D, Gaudrain E. Neural Entrainment to  
35 Speech Modulates Speech Intelligibility. *Curr Biol*. 2018;28(2):161-9 e5.
- 36 20. Riecke L, Sack AT, Schroeder CE. Endogenous Delta/Theta Sound-Brain Phase  
37 Entrainment Accelerates the Buildup of Auditory Streaming. *Curr Biol*. 2015;25(24):3196-201.
- 38 21. Wilsch A, Neuling T, Obleser J, Herrmann CS. Transcranial alternating current  
39 stimulation with speech envelopes modulates speech comprehension. *Neuroimage*.  
40 2018;172:766-74.
- 41 22. Cabral-Calderin Y, Wilke M. Probing the Link Between Perception and Oscillations:  
42 Lessons from Transcranial Alternating Current Stimulation. *Neuroscientist*. 2020;26(1):57-73.
- 43 23. Erkens J, Schulte M, Vormann M, Herrmann CS. Lacking Effects of Envelope  
44 Transcranial Alternating Current Stimulation Indicate the Need to Revise Envelope  
45 Transcranial Alternating Current Stimulation Methods. *Neurosci Insights*.  
46 2020;15:2633105520936623.
- 47 24. Henry MJ, Herrmann B. A precluding role of low-frequency oscillations for auditory  
48 perception in a continuous processing mode. *J Neurosci*. 2012;32(49):17525-7.
- 49 25. Schroeder CE, Lakatos P. Low-frequency neuronal oscillations as instruments of  
50 sensory selection. *Trends Neurosci*. 2009;32(1):9-18.



- 1 26. Henry MJ, Herrmann B, Kunke D, Obleser J. Aging affects the balance of neural  
2 entrainment and top-down neural modulation in the listening brain. *Nat Commun.*  
3 2017;8:15801.
- 4 27. Bauer AR, Bleichner MG, Jaeger M, Thorne JD, Debener S. Dynamic phase alignment  
5 of ongoing auditory cortex oscillations. *Neuroimage.* 2018;167:396-407.
- 6 28. Ding N, Simon JZ. Power and phase properties of oscillatory neural responses in the  
7 presence of background activity. *J Comput Neurosci.* 2013;34(2):337-43.
- 8 29. Zoefel B, Davis MH, Valente G, Riecke L. How to test for phasic modulation of neural  
9 and behavioural responses. *Neuroimage.* 2019;202:116175.
- 10 30. Mullensiefen D, Gingras B, Musil J, Stewart L. The musicality of non-musicians: an  
11 index for assessing musical sophistication in the general population. *PLoS One.*  
12 2014;9(2):e89642.
- 13 31. Meyer L, Sun Y, Martin AE. Synchronous, but not entrained: exogenous and  
14 endogenous cortical rhythms of speech and language processing. *Lang Cogn Neurosci.*  
15 2020;35(9):1089-99.
- 16 32. Rimmele JM, Morillon B, Poeppel D, Arnal LH. Proactive Sensing of Periodic and  
17 Aperiodic Auditory Patterns. *Trends Cogn Sci.* 2018;22(10):870-82.
- 18 33. Lakatos P, Gross J, Thut G. A New Unifying Account of the Roles of Neuronal  
19 Entrainment. *Curr Biol.* 2019;29(18):R890-R905.
- 20 34. Sameiro-Barbosa CM, Geiser E. Sensory Entrainment Mechanisms in Auditory  
21 Perception: Neural Synchronization Cortico-Striatal Activation. *Front Neurosci.* 2016;10:361.
- 22 35. Ng BS, Schroeder T, Kayser C. A precluding but not ensuring role of entrained low-  
23 frequency oscillations for auditory perception. *J Neurosci.* 2012;32(35):12268-76.
- 24 36. Harrington MO, Ashton JE, Ngo HV, Cairney SA. Phase-locked Auditory Stimulation  
25 of Theta Oscillations during Rapid Eye Movement Sleep. *Sleep.* 2020.
- 26 37. Calabro RS, Naro A, Filoni S, Pullia M, Billeri L, Tomasello P, et al. Walking to your  
27 right music: a randomized controlled trial on the novel use of treadmill plus music in  
28 Parkinson's disease. *J Neuroeng Rehabil.* 2019;16(1):68.
- 29 38. Hanslmayr S, Aslan A, Staudigl T, Klimesch W, Herrmann CS, Bauml KH. Prestimulus  
30 oscillations predict visual perception performance between and within subjects. *Neuroimage.*  
31 2007;37(4):1465-73.
- 32 39. Vanrullen R, Busch NA, Drewes J, Dubois J. Ongoing EEG Phase as a Trial-by-Trial  
33 Predictor of Perceptual and Attentional Variability. *Front Psychol.* 2011;2:60.
- 34 40. Wostmann M, Waschke L, Obleser J. Prestimulus neural alpha power predicts  
35 confidence in discriminating identical auditory stimuli. *Eur J Neurosci.* 2019;49(1):94-105.
- 36 41. Weisz N, Wuhle A, Monittola G, Demarchi G, Frey J, Popov T, et al. Prestimulus  
37 oscillatory power and connectivity patterns predispose conscious somatosensory perception.  
38 *Proc Natl Acad Sci U S A.* 2014;111(4):E417-25.
- 39 42. Stefanics G, Hangya B, Hernadi I, Winkler I, Lakatos P, Ulbert I. Phase entrainment of  
40 human delta oscillations can mediate the effects of expectation on reaction speed. *J Neurosci.*  
41 2010;30(41):13578-85.
- 42 43. Busch NA, VanRullen R. Spontaneous EEG oscillations reveal periodic sampling of  
43 visual attention. *Proc Natl Acad Sci U S A.* 2010;107(37):16048-53.
- 44 44. Busch NA, Dubois J, VanRullen R. The phase of ongoing EEG oscillations predicts  
45 visual perception. *J Neurosci.* 2009;29(24):7869-76.
- 46 45. Mathewson KE, Gratton G, Fabiani M, Beck DM, Ro T. To see or not to see:  
47 prestimulus alpha phase predicts visual awareness. *J Neurosci.* 2009;29(9):2725-32.
- 48 46. Fodor Z, Marosi C, Tombor L, Csukly G. Salient distractors open the door of perception:  
49 alpha desynchronization marks sensory gating in a working memory task. *Sci Rep.*  
50 2020;10(1):19179.

- 1 47. Spaak E, de Lange FP, Jensen O. Local entrainment of alpha oscillations by visual  
2 stimuli causes cyclic modulation of perception. *J Neurosci*. 2014;34(10):3536-44.
- 3 48. Hutchinson BT, Pammer K, Jack B. Pre-stimulus alpha predicts inattention blindness.  
4 *Conscious Cogn*. 2020;87:103034.
- 5 49. VanRullen R, Zoefel B, Ilhan B. On the cyclic nature of perception in vision versus  
6 audition. *Philos Trans R Soc Lond B Biol Sci*. 2014;369(1641):20130214.
- 7 50. Keitel C, Keitel A, Benwell CSY, Daube C, Thut G, Gross J. Stimulus-Driven Brain  
8 Rhythms within the Alpha Band: The Attentional-Modulation Conundrum. *J Neurosci*.  
9 2019;39(16):3119-29.
- 10 51. Isaichev SA, Derevyankin VT, Koptelov Yu M, Sokolov EN. Rhythmic alpha-activity  
11 generators in the human EEG. *Neurosci Behav Physiol*. 2001;31(1):49-53.
- 12 52. Weisz N, Hartmann T, Muller N, Lorenz I, Obleser J. Alpha rhythms in audition:  
13 cognitive and clinical perspectives. *Front Psychol*. 2011;2:73.
- 14 53. Billig AJ, Herrmann B, Rhone AE, Gander PE, Nourski KV, Snoad BF, et al. A Sound-  
15 Sensitive Source of Alpha Oscillations in Human Non-Primary Auditory Cortex. *J Neurosci*.  
16 2019;39(44):8679-89.
- 17 54. Schneider D, Herbst SK, Klatt L, Wöstmann M. Target Enhancement or Distractor  
18 Suppression? Functionally Distinct Alpha Oscillators form the Basis of Attention. *PsyArXiv*.  
19 2020.
- 20 55. Bonnefond M, Jensen O. Alpha oscillations serve to protect working memory  
21 maintenance against anticipated distracters. *Curr Biol*. 2012;22(20):1969-74.
- 22 56. Wostmann M, Alavash M, Obleser J. Alpha Oscillations in the Human Brain Implement  
23 Distractor Suppression Independent of Target Selection. *J Neurosci*. 2019;39(49):9797-805.
- 24 57. Woodrow H. Chapter: Time perception. *Handbook of experimental psychology*.  
25 Oxford, England: Wiley; England; 1951. p. 1224-36.
- 26 58. Fraisse P. Rhythm and Tempo. In: Deutsch D, editor. *Psychology of Music: Academic*  
27 *Press*; 1982. p. 149-80.
- 28 59. van Noorden L, Moelants D. Resonance in the Perception of Musical Pulse. *Journal of*  
29 *New Music Research*. 1999;28(1):43-66.
- 30 60. McAuley JD, Jones MR, Holub S, Johnston HM, Miller NS. The time of our lives: life  
31 span development of timing and event tracking. *J Exp Psychol Gen*. 2006;135(3):348-67.
- 32 61. MacDougall HG, Moore ST. Marching to the beat of the same drummer: the  
33 spontaneous tempo of human locomotion. *J Appl Physiol (1985)*. 2005;99(3):1164-73.
- 34 62. Allen GD. Speech rhythm: its relation to performance universals and articulatory  
35 timing. *Journal of Phonetics*. 1975;3(2):75-86.
- 36 63. Ruspantini I, Saarinen T, Belardinelli P, Jalava A, Parviainen T, Kujala J, et al.  
37 Corticomuscular coherence is tuned to the spontaneous rhythmicity of speech at 2-3 Hz. *J*  
38 *Neurosci*. 2012;32(11):3786-90.
- 39 64. Notbohm A, Kurths J, Herrmann CS. Modification of Brain Oscillations via Rhythmic  
40 Light Stimulation Provides Evidence for Entrainment but Not for Superposition of Event-  
41 Related Responses. *Front Hum Neurosci*. 2016;10.
- 42 65. Ding N, Patel AD, Chen L, Butler H, Luo C, Poeppel D. Temporal modulations in  
43 speech and music. *Neurosci Biobehav Rev*. 2017;81(Pt B):181-7.
- 44 66. Patel AD, Iversen JR, Chen Y, Repp BH. The influence of metricality and modality on  
45 synchronization with a beat. *Exp Brain Res*. 2005;163(2):226-38.
- 46 67. McAuley JD, Henry MJ. Modality effects in rhythm processing: Auditory encoding of  
47 visual rhythms is neither obligatory nor automatic. *Atten Percept Psychophys*.  
48 2010;72(5):1377-89.
- 49 68. Drake C, Jones MR, Baruch C. The development of rhythmic attending in auditory  
50 sequences: attunement, referent period, focal attending. *Cognition*. 2000;77(3):251-88.

- 1 69. Collyer CE, Broadbent HA, Church RM. Preferred rates of repetitive tapping and
- 2 categorical time production. *Percept Psychophys*. 1994;55(4):443-53.
- 3 70. Assaneo MF, Rimmele JM, Sanz Perl Y, Poeppel D. Speaking rhythmically can shape
- 4 hearing. *Nat Hum Behav*. 2020.

5
